# Supplementary material
Source: PubMed Central journal article supplement (PMC5156489)

## Supplementary Tables&Figures for "Disability Rises Gradually for a Cohort of Older Americans" (Verbrugge, Brown, Zajacova)

**Table S1.** Characteristics of the AHEAD Living Cohort, 1993-2010.

**Table S2.** AHEAD Analysis Cohort Sample Sizes by Baseline Age and Gender, 1993-2010.

**Table S3.** ADL, IADL, and PLIM Distributions for AHEAD Living Cohort, 1993-2010.

**Table S4A.** Mean ADL Disability of AHEAD Decedent Groups (Total, Baseline Age, Gender), 1993-2010.

**Table S4B.** Mean IADL Disability of AHEAD Decedent Groups (Total, Baseline Age, Gender), 1993-2010.

**Table S4C.** Mean PLIM Disability of AHEAD Decedent Groups (Total, Baseline Age, Gender), 1993-2010.

**Table S5A.** Mean ADL Disability of AHEAD Survivor Groups (Total, Baseline Age, Gender), 1993-2010.

**Table S5B.** Mean IADL Disability of AHEAD Survivor Groups (Total, Baseline Age, Gender), 1993-2010.

**Table S5C.** Mean PLIM Disability of AHEAD Survivor Groups (Total, Baseline Age, Gender), 1993-2010.

**Figure S1A.** Mean ADL Disability of AHEAD Decedent Groups (Total), 1993-2010.

**Figure S1B.** Mean IADL Disability of AHEAD Decedent Groups (Total), 1993-2010.

**Figure S1C.** Mean PLIM Disability of AHEAD Decedent Groups, (Total) 1993-2010.

**Figure S2A.** Mean ADL Disability of AHEAD Survivor Groups (Total), 1993-2010.

**Figure S2B.** Mean IADL Disability of AHEAD Survivor Groups (Total), 1993-2010.

**Figure S2C.** Mean PLIM Disability of AHEAD Survivor Groups (Total), 1993-2010.

**Figures S3A.** Mean ADL Disability of AHEAD Decedent Groups (Baseline Ages 70-79), 1993-2010.

**Figures S3B.** Mean ADL Disability of AHEAD Decedent Groups (Baseline Ages 80+), 1993-2010.

**Figures S3C.** Mean IADL Disability of AHEAD Decedent Groups (Baseline Ages 70-79), 1993-2010.

**Figures S3D.** Mean IADL Disability of AHEAD Decedent Groups (Baseline Ages 80+), 1993-2010.

**Figures S3E.** Mean PLIM Disability of AHEAD Decedent Groups (Baseline Ages 70-79), 1993-2010.

**Figures S3F.** Mean PLIM Disability of AHEAD Decedent Groups (Baseline Ages 80+), 1993-2010.

**Figure S3G.** Mean ADL Disability of AHEAD Decedent Groups (Women), 1993-2010.

**Figure S3H.** Mean ADL Disability of AHEAD Decedent Groups (Men), 1993-2010.

**Figure S3I.** Mean IADL Disability of AHEAD Decedent Groups (Women), 1993-2010.

**Figure S3J.** Mean IADL Disability of AHEAD Decedent Groups (Men), 1993-2010.

**Figure S3K.** Mean PLIM Disability of AHEAD Decedent Groups (Women), 1993-2010.

**Figure S3L.** Mean PLIM Disability of AHEAD Decedent Groups (Men), 1993-2010.

**Figure S4A.** Mean ADL Disability of AHEAD Survivor Groups (Baseline Ages 70-79), 1993-2010.

**Figure S4B.** Mean ADL Disability of AHEAD Survivor Groups (Baseline Ages 80+), 1993-2010.

**Figure S4C.** Mean IADL Disability of AHEAD Survivor Groups (Baseline Ages 70-79), 1993-2010.

**Figure S4D.** Mean IADL Disability of AHEAD Survivor Groups (Baseline Ages 80+), 1993-2010.

**Figure S4E.** Mean PLIM Disability of AHEAD Survivor Groups (Baseline Ages 70-79), 1993-2010.

**Figure S4F.** Mean PLIM Disability of AHEAD Survivor Groups (Baseline Ages 80+), 1993-2010.

**Figure S4G.** Mean ADL Disability of AHEAD Survivor Groups (Women), 1993-2010.

**Figure S4H.** Mean ADL Disability of AHEAD Survivor Groups (Men), 1993-2010.

**Figure S4I.** Mean IADL Disability of AHEAD Survivor Groups (Women), 1993-2010.

**Figure S4J.** Mean IADL Disability of AHEAD Survivor Groups (Men), 1993-2010.

**Figure S4K.** Mean PLIM Disability of AHEAD Survivor Groups (Women), 1993-2010.

**Figure S4L.** Mean PLIM Disability of AHEAD Survivor Groups (Men), 1993-2010.

Table S1. Characteristics of the AHEAD Living Cohort, 1993-2010.

|                             | Interview Wave <sup>a</sup> |               |               |               |               |               |               |               |               |
|-----------------------------|-----------------------------|---------------|---------------|---------------|---------------|---------------|---------------|---------------|---------------|
|                             | <u>Wave 1</u>               | <u>Wave 2</u> | <u>Wave 3</u> | <u>Wave 4</u> | <u>Wave 5</u> | <u>Wave 6</u> | <u>Wave 7</u> | <u>Wave 8</u> | <u>Wave 9</u> |
| Female, %                   | 59.7                        | 58.5          | 62.9          | 63.8          | 65.8          | 65.4          | 66.5          | 67.7          | 70.7          |
| Age in years                |                             |               |               |               |               |               |               |               |               |
| Mean                        | 77.5                        | 79.1          | 80.7          | 82.3          | 83.9          | 85.3          | 86.8          | 88.4          | 90.2          |
| Min                         | 69.0                        | 71.0          | 74.0          | 76.0          | 78.0          | 80.0          | 82.0          | 84.0          | 86.0          |
| Max                         | 103.0                       | 105.0         | 105.0         | 107.0         | 109.0         | 107.0         | 104.0         | 106.0         | 109.0         |
| Education in years,<br>mean | 11.0                        | 11.1          | 11.3          | 11.4          | 11.5          | 11.6          | 11.7          | 11.8          | 12.1          |
| Race-Ethnicity, %           |                             |               |               |               |               |               |               |               |               |
| White, Non-Hispanic         | 87.0                        | 87.2          | 87.2          | 87.0          | 87.6          | 88.4          | 88.6          | 88.6          | 89.8          |
| Black, Non-Hispanic         | 8.0                         | 7.7           | 7.4           | 7.7           | 7.2           | 6.6           | 6.3           | 6.1           | 5.4           |
| Hispanic, Any Race          | 3.8                         | 4.0           | 4.3           | 4.2           | 4.2           | 4.1           | 4.3           | 4.6           | 3.9           |
| Other, Non-Hispanic         | 1.2                         | 1.2           | 1.0           | 1.2           | 1.0           | 1.0           | 0.8           | 0.8           | 0.9           |
| Marital Status, %           |                             |               |               |               |               |               |               |               |               |
| Married/Partnered           | 52.4                        | 47.6          | 42.0          | 39.7          | 35.7          | 33.6          | 29.4          | 25.0          | 21.9          |
| Divorced/Separated          | 4.7                         | 4.7           | 5.0           | 4.7           | 4.4           | 4.1           | 4.7           | 4.6           | 5.4           |
| Widowed                     | 39.7                        | 44.5          | 49.7          | 52.7          | 56.9          | 59.7          | 63.7          | 68.3          | 68.8          |
| Never Married               | 3.2                         | 3.2           | 3.3           | 2.9           | 3.0           | 2.6           | 2.2           | 2.1           | 3.9           |

Source: RAND HRS Data File, Version M. Weighted.

<sup>a</sup> Waves 1-9 are years 1993, 1995, 1998, 2000, 2002, 2004, 2006, 2008, 2010.

Table S2. AHEAD Analysis Cohort Sample Sizes by Baseline Age and Gender, 1993-2010<sup>a</sup>.

|                                    | Interview Wave |               |               |               |               |               |               |               |               |
|------------------------------------|----------------|---------------|---------------|---------------|---------------|---------------|---------------|---------------|---------------|
|                                    | <u>Wave 1</u>  | <u>Wave 2</u> | <u>Wave 3</u> | <u>Wave 4</u> | <u>Wave 5</u> | <u>Wave 6</u> | <u>Wave 7</u> | <u>Wave 8</u> | <u>Wave 9</u> |
| <u>Ages 70-79</u>                  |                |               |               |               |               |               |               |               |               |
| <b>Respondents (living cohort)</b> | <b>4,703</b>   | <b>4,119</b>  | <b>3,634</b>  | <b>3,206</b>  | <b>2,688</b>  | <b>2,263</b>  | <b>1,834</b>  | <b>1,459</b>  | <b>999</b>    |
| Community dwelling                 | 4,703          | 4,045         | 3,499         | 3,051         | 2,513         | 2,076         | 1,644         | 1,278         | 829           |
| Nursing home                       | 0              | 74            | 135           | 155           | 175           | 187           | 190           | 181           | 170           |
| <u>Ages 80+</u>                    |                |               |               |               |               |               |               |               |               |
| <b>Respondents (living cohort)</b> | <b>2,524</b>   | <b>1,977</b>  | <b>1,480</b>  | <b>1,044</b>  | <b>716</b>    | <b>458</b>    | <b>277</b>    | <b>153</b>    | <b>66</b>     |
| Community dwelling                 | 2,524          | 1,805         | 1,254         | 833           | 536           | 333           | 202           | 108           | 48            |
| Nursing home                       | 0              | 172           | 226           | 211           | 180           | 125           | 75            | 45            | 18            |
| <u>Women</u>                       |                |               |               |               |               |               |               |               |               |
| <b>Respondents (living cohort)</b> | <b>4,392</b>   | <b>3,754</b>  | <b>3,212</b>  | <b>2,718</b>  | <b>2,210</b>  | <b>1,806</b>  | <b>1,422</b>  | <b>1,109</b>  | <b>747</b>    |
| Community dwelling                 | 4,392          | 3,580         | 2,942         | 2,433         | 1,934         | 1,553         | 1,209         | 925           | 594           |
| Nursing home                       | 0              | 174           | 270           | 285           | 276           | 253           | 213           | 184           | 153           |
| <u>Men</u>                         |                |               |               |               |               |               |               |               |               |
| <b>Respondents (living cohort)</b> | <b>2,835</b>   | <b>2,342</b>  | <b>1,902</b>  | <b>1,532</b>  | <b>1,194</b>  | <b>915</b>    | <b>689</b>    | <b>503</b>    | <b>318</b>    |
| Community dwelling                 | 2,835          | 2,270         | 1,811         | 1,451         | 1,115         | 856           | 637           | 461           | 283           |
| Nursing home                       | 0              | 72            | 91            | 81            | 79            | 59            | 52            | 42            | 35            |

Source: RAND HRS Data File, Version M. Weighted.

<sup>a</sup> Waves 1-9 are years 1993, 1995, 1998, 2000, 2002, 2004, 2006, 2008, 2010.

Table S3. ADL, IADL, and PLIM Distributions for AHEAD Living Cohort, 1993-2010<sup>a</sup>.

|                                            | <u>Wave 1</u> | <u>Wave 2</u> | <u>Wave 3</u> | <u>Wave 4</u> | <u>Wave 5</u> | <u>Wave 6</u> | <u>Wave 7</u> | <u>Wave 8</u> | <u>Wave 9</u> |
|--------------------------------------------|---------------|---------------|---------------|---------------|---------------|---------------|---------------|---------------|---------------|
| Activities of Daily Living, %              |               |               |               |               |               |               |               |               |               |
| 0                                          | 80.17         | 72.57         | 69.89         | 67.99         | 64.94         | 63.66         | 58.44         | 55.46         | 51.47         |
| 1                                          | 10.52         | 12.17         | 12.14         | 13.13         | 13.47         | 13.62         | 16.08         | 17.04         | 15.71         |
| 2                                          | 4.47          | 6.13          | 6.30          | 6.25          | 6.93          | 7.57          | 7.53          | 8.34          | 9.94          |
| 3                                          | 2.50          | 3.40          | 4.34          | 3.97          | 5.03          | 5.02          | 5.89          | 5.97          | 7.04          |
| 4                                          | 1.51          | 2.55          | 3.20          | 4.20          | 4.54          | 4.35          | 4.70          | 6.00          | 6.89          |
| 5                                          | 0.84          | 3.18          | 4.13          | 4.46          | 5.08          | 5.79          | 7.36          | 7.18          | 8.96          |
| Mean                                       | 0.37          | 0.61          | 0.71          | 0.77          | 0.86          | 0.90          | 1.04          | 1.12          | 1.29          |
| Instrumental Activities of Daily Living, % |               |               |               |               |               |               |               |               |               |
| 0                                          | 78.12         | 74.57         | 69.97         | 69.32         | 65.17         | 60.51         | 56.67         | 55.00         | 47.66         |
| 1                                          | 10.40         | 10.32         | 12.14         | 10.58         | 11.71         | 13.82         | 12.44         | 13.48         | 17.77         |
| 2                                          | 4.78          | 5.28          | 5.73          | 5.77          | 6.60          | 7.93          | 8.99          | 7.83          | 8.36          |
| 3                                          | 2.59          | 3.24          | 3.95          | 4.12          | 4.01          | 5.12          | 5.19          | 6.22          | 5.29          |
| 4                                          | 1.83          | 3.14          | 3.59          | 4.21          | 5.74          | 4.89          | 7.20          | 6.80          | 10.55         |
| 5                                          | 2.28          | 3.44          | 4.62          | 6.01          | 6.77          | 7.74          | 9.51          | 10.67         | 10.37         |
| Mean                                       | 0.46          | 0.60          | 0.73          | 0.81          | 0.94          | 1.03          | 1.22          | 1.28          | 1.44          |
| Other Physical Limitations, %              |               |               |               |               |               |               |               |               |               |
| 0                                          |               | 29.76         | 26.29         | 25.50         | 20.82         | 18.52         | 15.24         | 15.60         | 14.48         |
| 1                                          |               | 17.36         | 17.44         | 16.40         | 15.02         | 15.41         | 13.59         | 12.87         | 11.34         |
| 2                                          |               | 13.84         | 13.82         | 13.04         | 13.56         | 14.46         | 13.32         | 11.65         | 10.27         |
| 3                                          |               | 10.00         | 9.88          | 10.87         | 11.23         | 11.38         | 11.63         | 11.73         | 10.66         |
| 4                                          |               | 8.39          | 8.25          | 9.02          | 10.93         | 10.24         | 10.46         | 10.96         | 9.36          |
| 5                                          |               | 6.79          | 7.34          | 7.38          | 8.30          | 9.13          | 10.32         | 11.69         | 11.64         |
| 6                                          |               | 5.78          | 6.71          | 6.41          | 8.34          | 8.52          | 10.06         | 11.20         | 14.40         |
| 7                                          |               | 4.50          | 5.54          | 5.80          | 6.80          | 6.65          | 8.52          | 7.54          | 9.24          |
| 8                                          |               | 2.53          | 3.28          | 4.14          | 3.60          | 4.50          | 5.02          | 4.67          | 5.68          |
| 9                                          |               | 1.05          | 1.45          | 1.45          | 1.39          | 1.21          | 1.85          | 2.10          | 2.92          |
| Mean                                       |               | 2.38          | 2.63          | 2.73          | 3.00          | 3.10          | 3.45          | 3.50          | 3.82          |

Source: RAND HRS Data File, Version M. Weighted.

<sup>a</sup> Waves 1-9 are years 1993, 1995, 1998, 2000, 2002, 2004, 2006, 2008, 2010.

Table S4A. Mean ADL Disability of AHEAD Decedent Groups (Total, Baseline Age, Gender), 1993-2010<sup>a</sup>.

|                        | Interview Wave Died |                  |                  |                  |                  |                  |                  |                  |
|------------------------|---------------------|------------------|------------------|------------------|------------------|------------------|------------------|------------------|
|                        | <u>Died w1-2</u>    | <u>Died w2-3</u> | <u>Died w3-4</u> | <u>Died w4-5</u> | <u>Died w5-6</u> | <u>Died w6-7</u> | <u>Died w7-8</u> | <u>Died w8-9</u> |
| Total                  |                     |                  |                  |                  |                  |                  |                  |                  |
| Wave 1                 | 0.87                | 0.63             | 0.46             | 0.33             | 0.30             | 0.26             | 0.22             | 0.17             |
| Wave 2                 |                     | 1.52             | 0.95             | 0.67             | 0.48             | 0.40             | 0.32             | 0.19             |
| Wave 3                 |                     |                  | 1.70             | 1.11             | 0.82             | 0.52             | 0.47             | 0.22             |
| Wave 4                 |                     |                  |                  | 1.73             | 1.18             | 0.77             | 0.56             | 0.32             |
| Wave 5                 |                     |                  |                  |                  | 2.05             | 1.18             | 0.81             | 0.45             |
| Wave 6                 |                     |                  |                  |                  |                  | 1.89             | 1.30             | 0.68             |
| Wave 7                 |                     |                  |                  |                  |                  |                  | 1.96             | 1.23             |
| Wave 8                 |                     |                  |                  |                  |                  |                  |                  | 1.94             |
| Baseline Ages<br>70-79 |                     |                  |                  |                  |                  |                  |                  |                  |
| Wave 1                 | 0.71                | 0.52             | 0.43             | 0.30             | 0.27             | 0.24             | 0.20             | 0.16             |
| Wave 2                 |                     | 1.17             | 0.79             | 0.58             | 0.45             | 0.30             | 0.27             | 0.18             |
| Wave 3                 |                     |                  | 1.48             | 0.96             | 0.71             | 0.47             | 0.41             | 0.20             |
| Wave 4                 |                     |                  |                  | 1.46             | 0.97             | 0.66             | 0.49             | 0.30             |
| Wave 5                 |                     |                  |                  |                  | 1.74             | 1.03             | 0.68             | 0.40             |
| Wave 6                 |                     |                  |                  |                  |                  | 1.61             | 1.17             | 0.60             |
| Wave 7                 |                     |                  |                  |                  |                  |                  | 1.79             | 1.18             |
| Wave 8                 |                     |                  |                  |                  |                  |                  |                  | 1.85             |
| Baseline Ages<br>80+   |                     |                  |                  |                  |                  |                  |                  |                  |
| Wave 1                 | 1.02                | 0.74             | 0.49             | 0.38             | 0.34             | 0.30             | 0.28             | 0.20             |
| Wave 2                 |                     | 1.84             | 1.11             | 0.82             | 0.53             | 0.63             | 0.48             | 0.25             |
| Wave 3                 |                     |                  | 1.95             | 1.37             | 1.03             | 0.66             | 0.74             | 0.35             |
| Wave 4                 |                     |                  |                  | 2.18             | 1.54             | 1.03             | 0.77             | 0.48             |
| Wave 5                 |                     |                  |                  |                  | 2.61             | 1.54             | 1.28             | 0.73             |
| Wave 6                 |                     |                  |                  |                  |                  | 2.58             | 1.77             | 1.19             |
| Wave 7                 |                     |                  |                  |                  |                  |                  | 2.60             | 1.61             |
| Wave 8                 |                     |                  |                  |                  |                  |                  |                  | 2.48             |
| Women                  |                     |                  |                  |                  |                  |                  |                  |                  |
| Wave 1                 | 0.99                | 0.75             | 0.56             | 0.39             | 0.37             | 0.31             | 0.23             | 0.20             |
| Wave 2                 |                     | 1.70             | 1.22             | 0.80             | 0.58             | 0.52             | 0.34             | 0.23             |
| Wave 3                 |                     |                  | 2.00             | 1.31             | 1.01             | 0.66             | 0.53             | 0.27             |
| Wave 4                 |                     |                  |                  | 1.91             | 1.43             | 0.96             | 0.59             | 0.42             |
| Wave 5                 |                     |                  |                  |                  | 2.34             | 1.40             | 0.91             | 0.56             |
| Wave 6                 |                     |                  |                  |                  |                  | 2.18             | 1.38             | 0.84             |
| Wave 7                 |                     |                  |                  |                  |                  |                  | 2.02             | 1.43             |

|        |      |      |      |      |      |      |      |      |
|--------|------|------|------|------|------|------|------|------|
| Wave 8 |      |      |      |      |      |      |      | 2.16 |
| Men    |      |      |      |      |      |      |      |      |
| Wave 1 | 0.74 | 0.50 | 0.33 | 0.24 | 0.19 | 0.18 | 0.20 | 0.11 |
| Wave 2 |      | 1.30 | 0.62 | 0.49 | 0.33 | 0.24 | 0.28 | 0.12 |
| Wave 3 |      |      | 1.31 | 0.80 | 0.54 | 0.30 | 0.38 | 0.13 |
| Wave 4 |      |      |      | 1.47 | 0.81 | 0.45 | 0.49 | 0.14 |
| Wave 5 |      |      |      |      | 1.60 | 0.80 | 0.62 | 0.23 |
| Wave 6 |      |      |      |      |      | 1.40 | 1.14 | 0.40 |
| Wave 7 |      |      |      |      |      |      | 1.86 | 0.89 |
| Wave 8 |      |      |      |      |      |      |      | 1.54 |

---

Source: RAND HRS Data File, Version M. Weighted means.

<sup>a</sup> Waves 1-9 are years 1993, 1995, 1998, 2000, 2002, 2004, 2006, 2008, 2010.

Table S4B. Mean IADL Disability of AHEAD Decedent Groups (Total, Baseline Age, Gender), 1993-2010<sup>a</sup>.

|                        | Interview Wave Died |                  |                  |                  |                  |                  |                  |                  |
|------------------------|---------------------|------------------|------------------|------------------|------------------|------------------|------------------|------------------|
|                        | <u>Died w1-2</u>    | <u>Died w2-3</u> | <u>Died w3-4</u> | <u>Died w4-5</u> | <u>Died w5-6</u> | <u>Died w6-7</u> | <u>Died w7-8</u> | <u>Died w8-9</u> |
| Total                  |                     |                  |                  |                  |                  |                  |                  |                  |
| Wave 1                 | 1.28                | 0.95             | 0.62             | 0.39             | 0.29             | 0.21             | 0.16             | 0.10             |
| Wave 2                 |                     | 1.63             | 1.02             | 0.68             | 0.46             | 0.31             | 0.24             | 0.12             |
| Wave 3                 |                     |                  | 1.79             | 1.18             | 0.85             | 0.59             | 0.40             | 0.19             |
| Wave 4                 |                     |                  |                  | 1.87             | 1.28             | 0.91             | 0.56             | 0.30             |
| Wave 5                 |                     |                  |                  |                  | 2.13             | 1.42             | 0.91             | 0.49             |
| Wave 6                 |                     |                  |                  |                  |                  | 2.16             | 1.49             | 0.82             |
| Wave 7                 |                     |                  |                  |                  |                  |                  | 2.32             | 1.40             |
| Wave 8                 |                     |                  |                  |                  |                  |                  |                  | 2.15             |
| Baseline Ages<br>70-79 |                     |                  |                  |                  |                  |                  |                  |                  |
| Wave 1                 | 0.90                | 0.64             | 0.50             | 0.31             | 0.26             | 0.16             | 0.12             | 0.09             |
| Wave 2                 |                     | 1.15             | 0.81             | 0.52             | 0.42             | 0.23             | 0.18             | 0.10             |
| Wave 3                 |                     |                  | 1.53             | 0.98             | 0.69             | 0.50             | 0.33             | 0.17             |
| Wave 4                 |                     |                  |                  | 1.58             | 1.09             | 0.76             | 0.43             | 0.25             |
| Wave 5                 |                     |                  |                  |                  | 1.79             | 1.26             | 0.77             | 0.43             |
| Wave 6                 |                     |                  |                  |                  |                  | 1.89             | 1.35             | 0.74             |
| Wave 7                 |                     |                  |                  |                  |                  |                  | 2.20             | 1.31             |
| Wave 8                 |                     |                  |                  |                  |                  |                  |                  | 2.07             |
| Baseline Ages<br>80+   |                     |                  |                  |                  |                  |                  |                  |                  |
| Wave 1                 | 1.63                | 1.24             | 0.74             | 0.51             | 0.36             | 0.30             | 0.27             | 0.20             |
| Wave 2                 |                     | 2.08             | 1.23             | 0.94             | 0.54             | 0.51             | 0.44             | 0.25             |
| Wave 3                 |                     |                  | 2.08             | 1.52             | 1.16             | 0.84             | 0.69             | 0.37             |
| Wave 4                 |                     |                  |                  | 2.34             | 1.62             | 1.25             | 1.03             | 0.62             |
| Wave 5                 |                     |                  |                  |                  | 2.73             | 1.82             | 1.43             | 0.88             |
| Wave 6                 |                     |                  |                  |                  |                  | 2.84             | 2.02             | 1.32             |
| Wave 7                 |                     |                  |                  |                  |                  |                  | 2.76             | 1.98             |
| Wave 8                 |                     |                  |                  |                  |                  |                  |                  | 2.61             |
| Women                  |                     |                  |                  |                  |                  |                  |                  |                  |
| Wave 1                 | 1.45                | 1.09             | 0.78             | 0.45             | 0.33             | 0.26             | 0.19             | 0.13             |
| Wave 2                 |                     | 1.85             | 1.28             | 0.88             | 0.62             | 0.42             | 0.29             | 0.17             |
| Wave 3                 |                     |                  | 2.10             | 1.39             | 1.07             | 0.70             | 0.51             | 0.24             |
| Wave 4                 |                     |                  |                  | 2.12             | 1.51             | 1.14             | 0.69             | 0.40             |
| Wave 5                 |                     |                  |                  |                  | 2.40             | 1.62             | 1.07             | 0.63             |
| Wave 6                 |                     |                  |                  |                  |                  | 2.48             | 1.67             | 1.06             |
| Wave 7                 |                     |                  |                  |                  |                  |                  | 2.53             | 1.65             |

|        |      |      |      |      |      |      |      |      |
|--------|------|------|------|------|------|------|------|------|
| Wave 8 |      |      |      |      |      |      |      | 2.49 |
| Men    |      |      |      |      |      |      |      |      |
| Wave 1 | 1.08 | 0.79 | 0.41 | 0.29 | 0.24 | 0.12 | 0.10 | 0.06 |
| Wave 2 |      | 1.39 | 0.71 | 0.41 | 0.26 | 0.17 | 0.15 | 0.04 |
| Wave 3 |      |      | 1.39 | 0.84 | 0.52 | 0.42 | 0.21 | 0.10 |
| Wave 4 |      |      |      | 1.48 | 0.94 | 0.54 | 0.30 | 0.13 |
| Wave 5 |      |      |      |      | 1.71 | 1.06 | 0.60 | 0.23 |
| Wave 6 |      |      |      |      |      | 1.65 | 1.16 | 0.40 |
| Wave 7 |      |      |      |      |      |      | 1.91 | 0.97 |
| Wave 8 |      |      |      |      |      |      |      | 1.54 |

---

Source: RAND HRS Data File, Version M. Weighted means.

<sup>a</sup> Waves 1-9 are years 1993, 1995, 1998, 2000, 2002, 2004, 2006, 2008, 2010.



Table S4C. Mean PLIM Disability of AHEAD Decedent Groups (Total, Baseline Age, Gender), 1993-2010<sup>a</sup>.

|                        | Interview Wave Died |                  |                  |                  |                  |                  |                  |                  |
|------------------------|---------------------|------------------|------------------|------------------|------------------|------------------|------------------|------------------|
|                        | <u>Died w1-2</u>    | <u>Died w2-3</u> | <u>Died w3-4</u> | <u>Died w4-5</u> | <u>Died w5-6</u> | <u>Died w6-7</u> | <u>Died w7-8</u> | <u>Died w8-9</u> |
| Total                  |                     |                  |                  |                  |                  |                  |                  |                  |
| Wave 1                 |                     |                  |                  |                  |                  |                  |                  |                  |
| Wave 2                 |                     | 3.69             | 2.95             | 2.58             | 2.33             | 2.20             | 2.02             | 1.68             |
| Wave 3                 |                     |                  | 4.00             | 3.26             | 2.91             | 2.58             | 2.30             | 2.04             |
| Wave 4                 |                     |                  |                  | 3.98             | 3.39             | 2.85             | 2.59             | 2.24             |
| Wave 5                 |                     |                  |                  |                  | 4.34             | 3.50             | 2.99             | 2.71             |
| Wave 6                 |                     |                  |                  |                  |                  | 4.33             | 3.53             | 2.95             |
| Wave 7                 |                     |                  |                  |                  |                  |                  | 4.41             | 3.83             |
| Wave 8                 |                     |                  |                  |                  |                  |                  |                  | 4.46             |
| Baseline Ages<br>70-79 |                     |                  |                  |                  |                  |                  |                  |                  |
| Wave 1                 |                     |                  |                  |                  |                  |                  |                  |                  |
| Wave 2                 |                     | 3.38             | 2.75             | 2.33             | 2.23             | 2.11             | 1.95             | 1.63             |
| Wave 3                 |                     |                  | 3.73             | 3.04             | 2.72             | 2.43             | 2.20             | 1.99             |
| Wave 4                 |                     |                  |                  | 3.66             | 3.16             | 2.72             | 2.45             | 2.16             |
| Wave 5                 |                     |                  |                  |                  | 4.14             | 3.36             | 2.84             | 2.62             |
| Wave 6                 |                     |                  |                  |                  |                  | 4.13             | 3.41             | 2.85             |
| Wave 7                 |                     |                  |                  |                  |                  |                  | 4.33             | 3.71             |
| Wave 8                 |                     |                  |                  |                  |                  |                  |                  | 4.31             |
| Baseline Ages<br>80+   |                     |                  |                  |                  |                  |                  |                  |                  |
| Wave 1                 |                     |                  |                  |                  |                  |                  |                  |                  |
| Wave 2                 |                     | 3.98             | 3.17             | 2.99             | 2.51             | 2.41             | 2.28             | 2.00             |
| Wave 3                 |                     |                  | 4.28             | 3.66             | 3.28             | 2.94             | 2.73             | 2.34             |
| Wave 4                 |                     |                  |                  | 4.51             | 3.81             | 3.14             | 3.08             | 2.74             |
| Wave 5                 |                     |                  |                  |                  | 4.69             | 3.86             | 3.53             | 3.28             |
| Wave 6                 |                     |                  |                  |                  |                  | 4.84             | 3.97             | 3.61             |
| Wave 7                 |                     |                  |                  |                  |                  |                  | 4.72             | 4.62             |
| Wave 8                 |                     |                  |                  |                  |                  |                  |                  | 5.36             |
| Women                  |                     |                  |                  |                  |                  |                  |                  |                  |
| Wave 1                 |                     |                  |                  |                  |                  |                  |                  |                  |
| Wave 2                 |                     | 4.09             | 3.48             | 3.05             | 2.79             | 2.63             | 2.26             | 2.09             |
| Wave 3                 |                     |                  | 4.45             | 3.59             | 3.35             | 3.11             | 2.54             | 2.36             |
| Wave 4                 |                     |                  |                  | 4.23             | 3.83             | 3.38             | 2.71             | 2.59             |
| Wave 5                 |                     |                  |                  |                  | 4.71             | 3.98             | 3.24             | 3.09             |
| Wave 6                 |                     |                  |                  |                  |                  | 4.75             | 3.57             | 3.33             |
| Wave 7                 |                     |                  |                  |                  |                  |                  | 4.44             | 4.21             |

|        |      |      |      |      |      |      |  |      |
|--------|------|------|------|------|------|------|--|------|
| Wave 8 |      |      |      |      |      |      |  | 4.75 |
| Men    |      |      |      |      |      |      |  |      |
| Wave 1 |      |      |      |      |      |      |  |      |
| Wave 2 | 3.22 | 2.33 | 1.94 | 1.73 | 1.60 | 1.63 |  | 1.06 |
| Wave 3 |      | 3.39 | 2.77 | 2.24 | 1.73 | 1.86 |  | 1.45 |
| Wave 4 |      |      | 3.60 | 2.76 | 1.98 | 2.35 |  | 1.62 |
| Wave 5 |      |      |      | 3.77 | 2.69 | 2.50 |  | 1.98 |
| Wave 6 |      |      |      |      | 3.64 | 3.46 |  | 2.30 |
| Wave 7 |      |      |      |      |      | 4.35 |  | 3.18 |
| Wave 8 |      |      |      |      |      |      |  | 3.94 |

---

Source: RAND HRS Data File, Version M. Weighted means.

<sup>a</sup> Waves 1-9 are years 1993, 1995, 1998, 2000, 2002, 2004, 2006, 2008, 2010.

Table S5A. Mean ADL Disability of AHEAD Survivor Groups (Total, Baseline Age, Gender), 1993-2010<sup>a</sup>.

|                     | Interview Waves Alive |               |               |               |               |               |               |               |               |
|---------------------|-----------------------|---------------|---------------|---------------|---------------|---------------|---------------|---------------|---------------|
|                     | <u>Wave 1</u>         | <u>Wave 2</u> | <u>Wave 3</u> | <u>Wave 4</u> | <u>Wave 5</u> | <u>Wave 6</u> | <u>Wave 7</u> | <u>Wave 8</u> | <u>Wave 9</u> |
| Total               |                       |               |               |               |               |               |               |               |               |
| Alive Wave 1        | 0.37                  |               |               |               |               |               |               |               |               |
| Alive Waves 1-2     | 0.31                  | 0.61          |               |               |               |               |               |               |               |
| Alive Waves 1-3     | 0.25                  | 0.45          | 0.71          |               |               |               |               |               |               |
| Alive Waves 1-4     | 0.22                  | 0.36          | 0.53          | 0.77          |               |               |               |               |               |
| Alive Waves 1-5     | 0.19                  | 0.29          | 0.41          | 0.56          | 0.86          |               |               |               |               |
| Alive Waves 1-6     | 0.17                  | 0.24          | 0.31          | 0.42          | 0.60          | 0.90          |               |               |               |
| Alive Waves 1-7     | 0.14                  | 0.20          | 0.26          | 0.33          | 0.45          | 0.64          | 1.04          |               |               |
| Alive Waves 1-8     | 0.12                  | 0.16          | 0.19          | 0.26          | 0.34          | 0.44          | 0.76          | 1.12          |               |
| Alive Waves 1-9     | 0.09                  | 0.14          | 0.17          | 0.22          | 0.28          | 0.33          | 0.53          | 0.73          | 1.29          |
| Baseline Ages 70-79 |                       |               |               |               |               |               |               |               |               |
| Alive Wave 1        | 0.28                  |               |               |               |               |               |               |               |               |
| Alive Waves 1-2     | 0.24                  | 0.42          |               |               |               |               |               |               |               |
| Alive Waves 1-3     | 0.21                  | 0.34          | 0.54          |               |               |               |               |               |               |
| Alive Waves 1-4     | 0.19                  | 0.28          | 0.42          | 0.59          |               |               |               |               |               |
| Alive Waves 1-5     | 0.17                  | 0.23          | 0.33          | 0.45          | 0.68          |               |               |               |               |
| Alive Waves 1-6     | 0.15                  | 0.19          | 0.27          | 0.36          | 0.50          | 0.74          |               |               |               |
| Alive Waves 1-7     | 0.13                  | 0.17          | 0.23          | 0.29          | 0.39          | 0.56          | 0.93          |               |               |
| Alive Waves 1-8     | 0.11                  | 0.14          | 0.18          | 0.24          | 0.31          | 0.40          | 0.70          | 1.04          |               |
| Alive Waves 1-9     | 0.09                  | 0.13          | 0.17          | 0.22          | 0.28          | 0.32          | 0.50          | 0.70          | 1.23          |
| Baseline Ages 80+   |                       |               |               |               |               |               |               |               |               |
| Alive Wave 1        | 0.55                  |               |               |               |               |               |               |               |               |
| Alive Waves 1-2     | 0.46                  | 1.02          |               |               |               |               |               |               |               |
| Alive Waves 1-3     | 0.36                  | 0.75          | 1.23          |               |               |               |               |               |               |
| Alive Waves 1-4     | 0.31                  | 0.60          | 0.94          | 1.37          |               |               |               |               |               |
| Alive Waves 1-5     | 0.29                  | 0.50          | 0.74          | 1.03          | 1.68          |               |               |               |               |
| Alive Waves 1-6     | 0.26                  | 0.49          | 0.58          | 0.76          | 1.17          | 1.84          |               |               |               |
| Alive Waves 1-7     | 0.22                  | 0.38          | 0.52          | 0.57          | 0.91          | 1.31          | 1.96          |               |               |
| Alive Waves 1-8     | 0.18                  | 0.30          | 0.34          | 0.41          | 0.60          | 0.92          | 1.40          | 2.03          |               |
| Alive Waves 1-9     | 0.14                  | 0.37          | 0.33          | 0.31          | 0.44          | 0.60          | 1.14          | 1.43          | 2.50          |
| Women               |                       |               |               |               |               |               |               |               |               |
| Alive Wave 1        | 0.42                  |               |               |               |               |               |               |               |               |
| Alive Waves 1-2     | 0.36                  | 0.70          |               |               |               |               |               |               |               |
| Alive Waves 1-3     | 0.29                  | 0.54          | 0.81          |               |               |               |               |               |               |
| Alive Waves 1-4     | 0.25                  | 0.42          | 0.62          | 0.86          |               |               |               |               |               |
| Alive Waves 1-5     | 0.22                  | 0.34          | 0.48          | 0.65          | 0.96          |               |               |               |               |
| Alive Waves 1-6     | 0.19                  | 0.29          | 0.37          | 0.49          | 0.68          | 1.01          |               |               |               |

|                 |      |      |      |      |      |      |      |      |      |
|-----------------|------|------|------|------|------|------|------|------|------|
| Alive Waves 1-7 | 0.16 | 0.23 | 0.30 | 0.37 | 0.51 | 0.72 | 1.13 |      |      |
| Alive Waves 1-8 | 0.14 | 0.20 | 0.23 | 0.31 | 0.40 | 0.52 | 0.86 | 1.24 |      |
| Alive Waves 1-9 | 0.11 | 0.18 | 0.21 | 0.25 | 0.32 | 0.38 | 0.60 | 0.85 | 1.40 |

## Men

|                 |      |      |      |      |      |      |      |      |      |
|-----------------|------|------|------|------|------|------|------|------|------|
| Alive Wave 1    | 0.30 |      |      |      |      |      |      |      |      |
| Alive Waves 1-2 | 0.24 | 0.48 |      |      |      |      |      |      |      |
| Alive Waves 1-3 | 0.19 | 0.32 | 0.54 |      |      |      |      |      |      |
| Alive Waves 1-4 | 0.16 | 0.26 | 0.38 | 0.61 |      |      |      |      |      |
| Alive Waves 1-5 | 0.14 | 0.20 | 0.27 | 0.40 | 0.67 |      |      |      |      |
| Alive Waves 1-6 | 0.13 | 0.16 | 0.21 | 0.29 | 0.42 | 0.70 |      |      |      |
| Alive Waves 1-7 | 0.11 | 0.14 | 0.18 | 0.24 | 0.31 | 0.49 | 0.87 |      |      |
| Alive Waves 1-8 | 0.08 | 0.09 | 0.11 | 0.15 | 0.21 | 0.29 | 0.56 | 0.85 |      |
| Alive Waves 1-9 | 0.06 | 0.07 | 0.10 | 0.16 | 0.19 | 0.23 | 0.37 | 0.48 | 1.03 |

Source: RAND HRS Data File, Version M. Weighted means.

<sup>a</sup> Waves 1-9 are years 1993, 1995, 1998, 2000, 2002, 2004, 2006, 2008, 2010.

Table S5B. Mean IADL Disability of AHEAD Survivor Groups (Total, Baseline Age, Gender), 1993-2010<sup>a</sup>.

|                     | Interview Waves Alive |               |               |               |               |               |               |               |               |
|---------------------|-----------------------|---------------|---------------|---------------|---------------|---------------|---------------|---------------|---------------|
|                     | <u>Wave 1</u>         | <u>Wave 2</u> | <u>Wave 3</u> | <u>Wave 4</u> | <u>Wave 5</u> | <u>Wave 6</u> | <u>Wave 7</u> | <u>Wave 8</u> | <u>Wave 9</u> |
| Total               |                       |               |               |               |               |               |               |               |               |
| Alive Wave 1        | 0.46                  |               |               |               |               |               |               |               |               |
| Alive Waves 1-2     | 0.37                  | 0.60          |               |               |               |               |               |               |               |
| Alive Waves 1-3     | 0.26                  | 0.43          | 0.73          |               |               |               |               |               |               |
| Alive Waves 1-4     | 0.19                  | 0.32          | 0.54          | 0.81          |               |               |               |               |               |
| Alive Waves 1-5     | 0.15                  | 0.23          | 0.40          | 0.59          | 0.94          |               |               |               |               |
| Alive Waves 1-6     | 0.12                  | 0.18          | 0.29          | 0.43          | 0.68          | 1.03          |               |               |               |
| Alive Waves 1-7     | 0.09                  | 0.14          | 0.22          | 0.31          | 0.48          | 0.73          | 1.22          |               |               |
| Alive Waves 1-8     | 0.07                  | 0.11          | 0.16          | 0.23          | 0.35          | 0.50          | 0.88          | 1.28          |               |
| Alive Waves 1-9     | 0.06                  | 0.10          | 0.14          | 0.19          | 0.29          | 0.35          | 0.63          | 0.88          | 1.44          |
| Baseline Ages 70-79 |                       |               |               |               |               |               |               |               |               |
| Alive Wave 1        | 0.28                  |               |               |               |               |               |               |               |               |
| Alive Waves 1-2     | 0.23                  | 0.38          |               |               |               |               |               |               |               |
| Alive Waves 1-3     | 0.18                  | 0.29          | 0.52          |               |               |               |               |               |               |
| Alive Waves 1-4     | 0.14                  | 0.23          | 0.40          | 0.61          |               |               |               |               |               |
| Alive Waves 1-5     | 0.12                  | 0.18          | 0.31          | 0.45          | 0.73          |               |               |               |               |
| Alive Waves 1-6     | 0.09                  | 0.13          | 0.24          | 0.34          | 0.56          | 0.86          |               |               |               |
| Alive Waves 1-7     | 0.08                  | 0.11          | 0.18          | 0.25          | 0.41          | 0.64          | 1.12          |               |               |
| Alive Waves 1-8     | 0.07                  | 0.09          | 0.14          | 0.20          | 0.32          | 0.46          | 0.82          | 1.21          |               |
| Alive Waves 1-9     | 0.06                  | 0.09          | 0.14          | 0.18          | 0.28          | 0.34          | 0.61          | 0.84          | 1.38          |
| Baseline Ages 80+   |                       |               |               |               |               |               |               |               |               |
| Alive Wave 1        | 0.83                  |               |               |               |               |               |               |               |               |
| Alive Waves 1-2     | 0.67                  | 1.10          |               |               |               |               |               |               |               |
| Alive Waves 1-3     | 0.47                  | 0.79          | 1.34          |               |               |               |               |               |               |
| Alive Waves 1-4     | 0.36                  | 0.61          | 1.04          | 1.52          |               |               |               |               |               |
| Alive Waves 1-5     | 0.29                  | 0.46          | 0.82          | 1.18          | 1.84          |               |               |               |               |
| Alive Waves 1-6     | 0.25                  | 0.42          | 0.63          | 0.94          | 1.36          | 2.05          |               |               |               |
| Alive Waves 1-7     | 0.22                  | 0.35          | 0.48          | 0.74          | 1.04          | 1.50          | 2.11          |               |               |
| Alive Waves 1-8     | 0.17                  | 0.27          | 0.30          | 0.50          | 0.72          | 1.04          | 1.55          | 2.20          |               |
| Alive Waves 1-9     | 0.12                  | 0.30          | 0.22          | 0.34          | 0.52          | 0.70          | 0.99          | 1.67          | 2.64          |
| Women               |                       |               |               |               |               |               |               |               |               |
| Alive Wave 1        | 0.51                  |               |               |               |               |               |               |               |               |
| Alive Waves 1-2     | 0.41                  | 0.70          |               |               |               |               |               |               |               |
| Alive Waves 1-3     | 0.31                  | 0.53          | 0.83          |               |               |               |               |               |               |
| Alive Waves 1-4     | 0.22                  | 0.40          | 0.63          | 0.93          |               |               |               |               |               |
| Alive Waves 1-5     | 0.18                  | 0.30          | 0.47          | 0.70          | 1.05          |               |               |               |               |
| Alive Waves 1-6     | 0.14                  | 0.23          | 0.35          | 0.53          | 0.78          | 1.18          |               |               |               |

|                 |      |      |      |      |      |      |      |      |      |
|-----------------|------|------|------|------|------|------|------|------|------|
| Alive Waves 1-7 | 0.11 | 0.18 | 0.26 | 0.39 | 0.57 | 0.86 | 1.37 |      |      |
| Alive Waves 1-8 | 0.09 | 0.14 | 0.19 | 0.29 | 0.43 | 0.62 | 1.01 | 1.46 |      |
| Alive Waves 1-9 | 0.07 | 0.13 | 0.16 | 0.24 | 0.34 | 0.42 | 0.74 | 1.02 | 1.57 |

## Men

|                 |      |      |      |      |      |      |      |      |      |
|-----------------|------|------|------|------|------|------|------|------|------|
| Alive Wave 1    | 0.39 |      |      |      |      |      |      |      |      |
| Alive Waves 1-2 | 0.30 | 0.46 |      |      |      |      |      |      |      |
| Alive Waves 1-3 | 0.19 | 0.28 | 0.56 |      |      |      |      |      |      |
| Alive Waves 1-4 | 0.14 | 0.19 | 0.38 | 0.60 |      |      |      |      |      |
| Alive Waves 1-5 | 0.11 | 0.13 | 0.26 | 0.39 | 0.73 |      |      |      |      |
| Alive Waves 1-6 | 0.07 | 0.10 | 0.19 | 0.24 | 0.47 | 0.75 |      |      |      |
| Alive Waves 1-7 | 0.06 | 0.08 | 0.13 | 0.15 | 0.29 | 0.49 | 0.93 |      |      |
| Alive Waves 1-8 | 0.04 | 0.05 | 0.10 | 0.10 | 0.19 | 0.28 | 0.61 | 0.92 |      |
| Alive Waves 1-9 | 0.03 | 0.06 | 0.10 | 0.08 | 0.17 | 0.21 | 0.41 | 0.58 | 1.14 |

Source: RAND HRS Data File, Version M. Weighted means.

<sup>a</sup> Waves 1-9 are years 1993, 1995, 1998, 2000, 2002, 2004, 2006, 2008, 2010.

Table S5C. Mean PLIM Disability of AHEAD Survivor Groups (Total, Baseline Age, Gender), 1993-2010<sup>a</sup>.

|                            | Interview Waves Alive |               |               |               |               |               |               |               |               |
|----------------------------|-----------------------|---------------|---------------|---------------|---------------|---------------|---------------|---------------|---------------|
|                            | <u>Wave 1</u>         | <u>Wave 2</u> | <u>Wave 3</u> | <u>Wave 4</u> | <u>Wave 5</u> | <u>Wave 6</u> | <u>Wave 7</u> | <u>Wave 8</u> | <u>Wave 9</u> |
| <b>Total</b>               |                       |               |               |               |               |               |               |               |               |
| Alive Wave 2               |                       | 2.38          |               |               |               |               |               |               |               |
| Alive Waves 2-3            |                       | 2.16          | 2.63          |               |               |               |               |               |               |
| Alive Waves 2-4            |                       | 2.01          | 2.38          | 2.73          |               |               |               |               |               |
| Alive Waves 2-5            |                       | 1.88          | 2.19          | 2.47          | 3.00          |               |               |               |               |
| Alive Waves 2-6            |                       | 1.77          | 2.02          | 2.25          | 2.70          | 3.10          |               |               |               |
| Alive Waves 2-7            |                       | 1.64          | 1.87          | 2.09          | 2.50          | 2.77          | 3.45          |               |               |
| Alive Waves 2-8            |                       | 1.52          | 1.74          | 1.94          | 2.35          | 2.54          | 3.15          | 3.50          |               |
| Alive Waves 2-9            |                       | 1.45          | 1.59          | 1.79          | 2.18          | 2.34          | 2.83          | 3.05          | 3.82          |
| <b>Baseline Ages 70-79</b> |                       |               |               |               |               |               |               |               |               |
| Alive Wave 2               |                       | 2.09          |               |               |               |               |               |               |               |
| Alive Waves 2-3            |                       | 1.95          | 2.35          |               |               |               |               |               |               |
| Alive Waves 2-4            |                       | 1.85          | 2.18          | 2.48          |               |               |               |               |               |
| Alive Waves 2-5            |                       | 1.76          | 2.04          | 2.29          | 2.79          |               |               |               |               |
| Alive Waves 2-6            |                       | 1.67          | 1.91          | 2.13          | 2.57          | 2.92          |               |               |               |
| Alive Waves 2-7            |                       | 1.58          | 1.81          | 2.01          | 2.40          | 2.67          | 3.32          |               |               |
| Alive Waves 2-8            |                       | 1.48          | 1.70          | 1.90          | 2.29          | 2.48          | 3.06          | 3.38          |               |
| Alive Waves 2-9            |                       | 1.42          | 1.57          | 1.78          | 2.15          | 2.31          | 2.77          | 2.99          | 3.77          |
| <b>Baseline Ages 80+</b>   |                       |               |               |               |               |               |               |               |               |
| Alive Wave 2               |                       | 3.04          |               |               |               |               |               |               |               |
| Alive Waves 2-3            |                       | 2.72          | 3.45          |               |               |               |               |               |               |
| Alive Waves 2-4            |                       | 2.55          | 3.12          | 3.59          |               |               |               |               |               |
| Alive Waves 2-5            |                       | 2.35          | 2.87          | 3.21          | 3.92          |               |               |               |               |
| Alive Waves 2-6            |                       | 2.26          | 2.65          | 2.90          | 3.50          | 4.12          |               |               |               |
| Alive Waves 2-7            |                       | 2.12          | 2.42          | 2.73          | 3.26          | 3.61          | 4.51          |               |               |
| Alive Waves 2-8            |                       | 1.99          | 2.17          | 2.44          | 3.04          | 3.29          | 4.34          | 4.84          |               |
| Alive Waves 2-9            |                       | 1.98          | 1.95          | 2.04          | 2.73          | 2.91          | 3.97          | 4.16          | 4.94          |
| <b>Women</b>               |                       |               |               |               |               |               |               |               |               |
| Alive Wave 2               |                       | 2.73          |               |               |               |               |               |               |               |
| Alive Waves 2-3            |                       | 2.51          | 2.93          |               |               |               |               |               |               |
| Alive Waves 2-4            |                       | 2.35          | 2.68          | 3.01          |               |               |               |               |               |
| Alive Waves 2-5            |                       | 2.20          | 2.50          | 2.77          | 3.29          |               |               |               |               |
| Alive Waves 2-6            |                       | 2.07          | 2.32          | 2.56          | 3.01          | 3.35          |               |               |               |
| Alive Waves 2-7            |                       | 1.93          | 2.13          | 2.35          | 2.77          | 3.00          | 3.72          |               |               |
| Alive Waves 2-8            |                       | 1.83          | 2.01          | 2.24          | 2.64          | 2.83          | 3.50          | 3.81          |               |
| Alive Waves 2-9            |                       | 1.71          | 1.85          | 2.08          | 2.44          | 2.61          | 3.19          | 3.41          | 4.11          |

## Men

|                 |      |      |      |      |      |      |      |      |
|-----------------|------|------|------|------|------|------|------|------|
| Alive Wave 2    | 1.90 |      |      |      |      |      |      |      |
| Alive Waves 2-3 | 1.64 | 2.12 |      |      |      |      |      |      |
| Alive Waves 2-4 | 1.49 | 1.85 | 2.24 |      |      |      |      |      |
| Alive Waves 2-5 | 1.38 | 1.61 | 1.91 | 2.44 |      |      |      |      |
| Alive Waves 2-6 | 1.26 | 1.44 | 1.67 | 2.09 | 2.62 |      |      |      |
| Alive Waves 2-7 | 1.16 | 1.35 | 1.57 | 1.91 | 2.32 | 2.92 |      |      |
| Alive Waves 2-8 | 1.01 | 1.18 | 1.32 | 1.71 | 1.95 | 2.47 | 2.84 |      |
| Alive Waves 2-9 | 0.98 | 1.03 | 1.15 | 1.57 | 1.76 | 2.06 | 2.25 | 3.15 |

---

Source: RAND HRS Data File, Version M. Weighted means.

<sup>a</sup> Waves 1-9 are years 1993, 1995, 1998, 2000, 2002, 2004, 2006, 2008, 2010.



Figure S1A. Mean ADL Disability of AHEAD Decedent Groups (Total), 1993-2010.

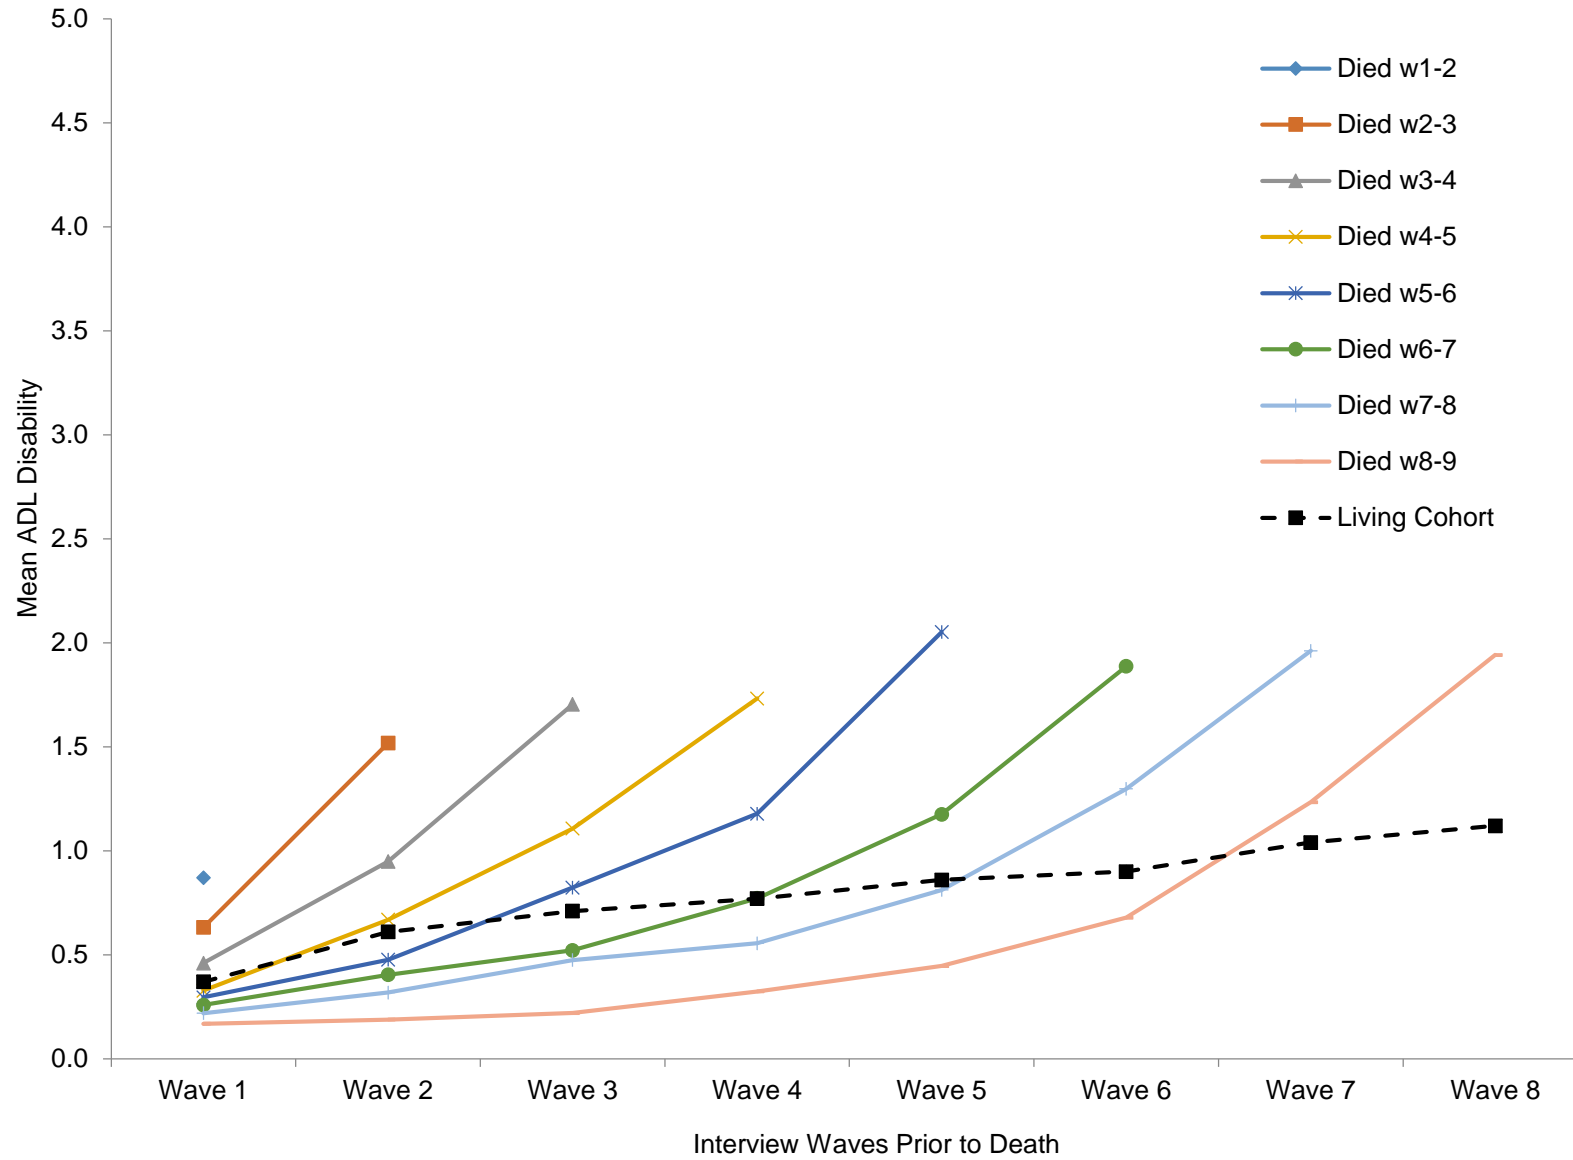

Figure S1B. Mean IADL Disability of AHEAD Decedent Groups (Total), 1993-2010.

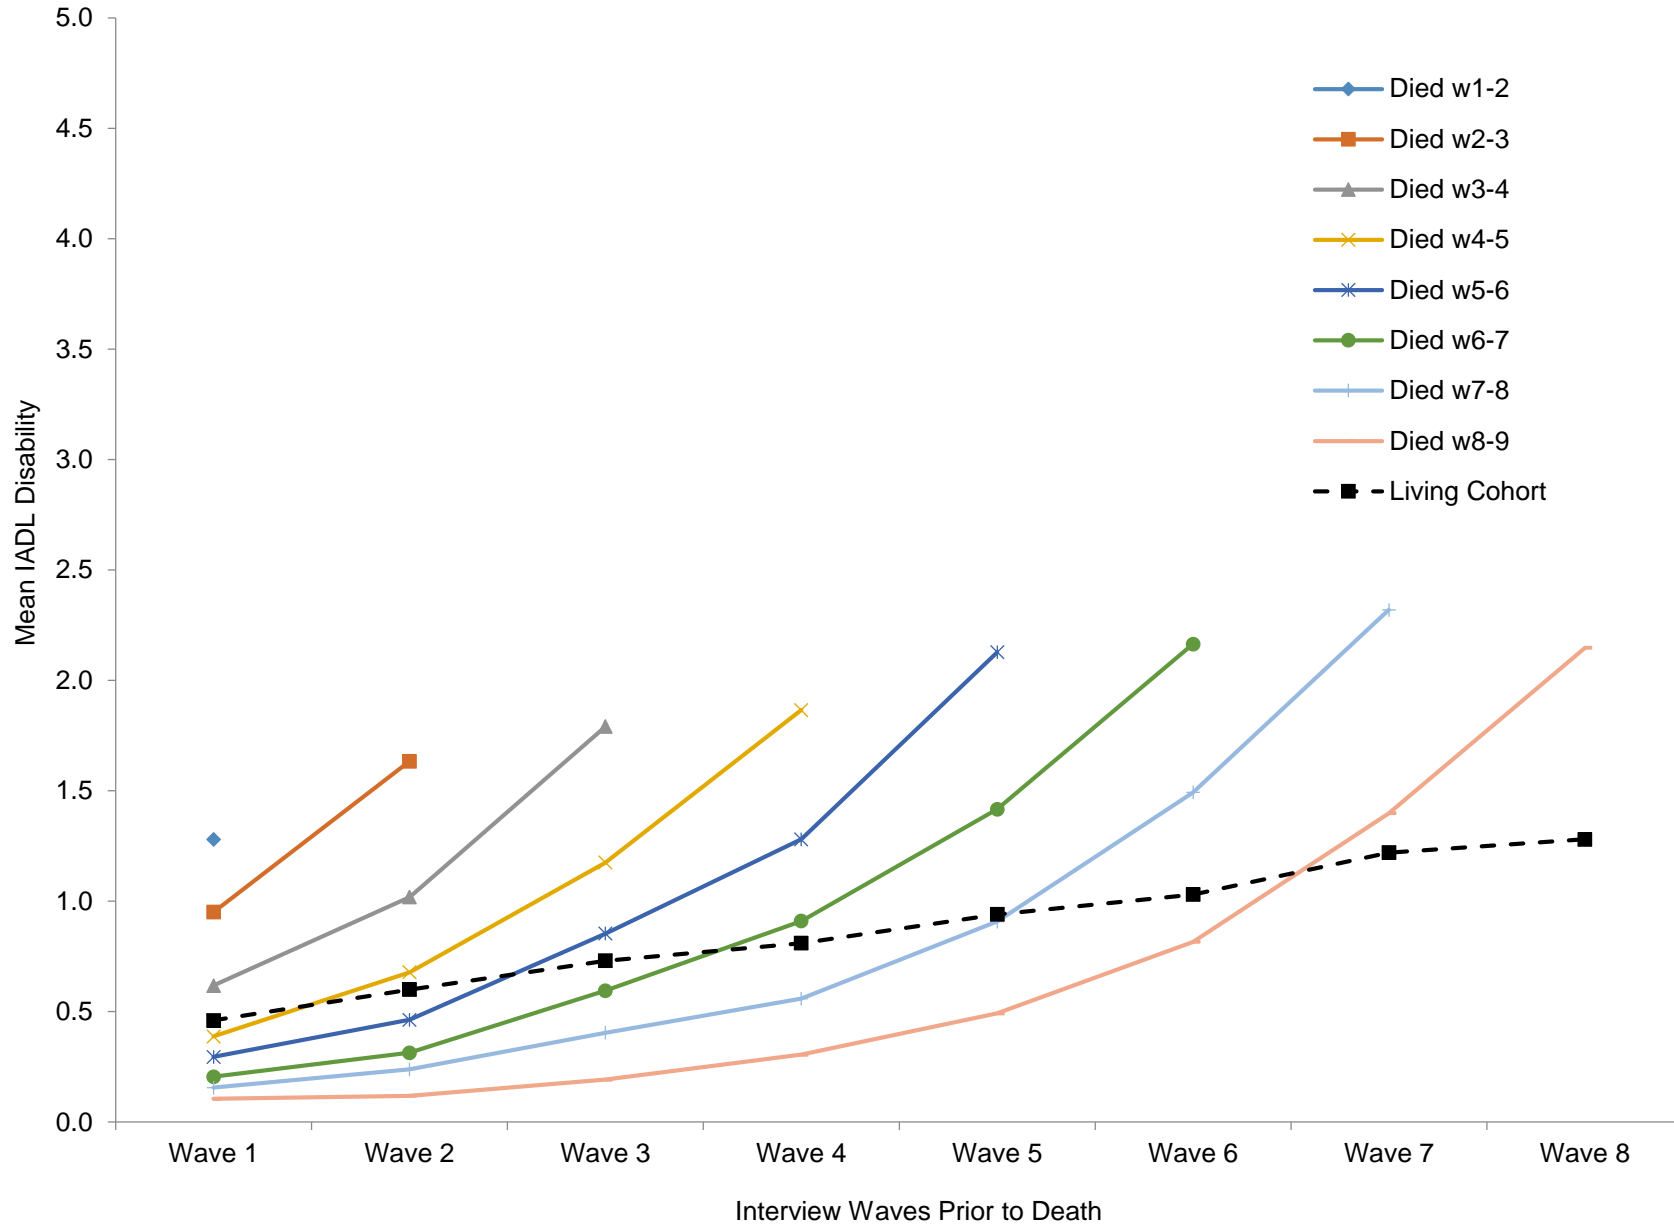

Figure S1C. Mean PLIM Disability of AHEAD Decedent Groups (Total), 1993-2010.

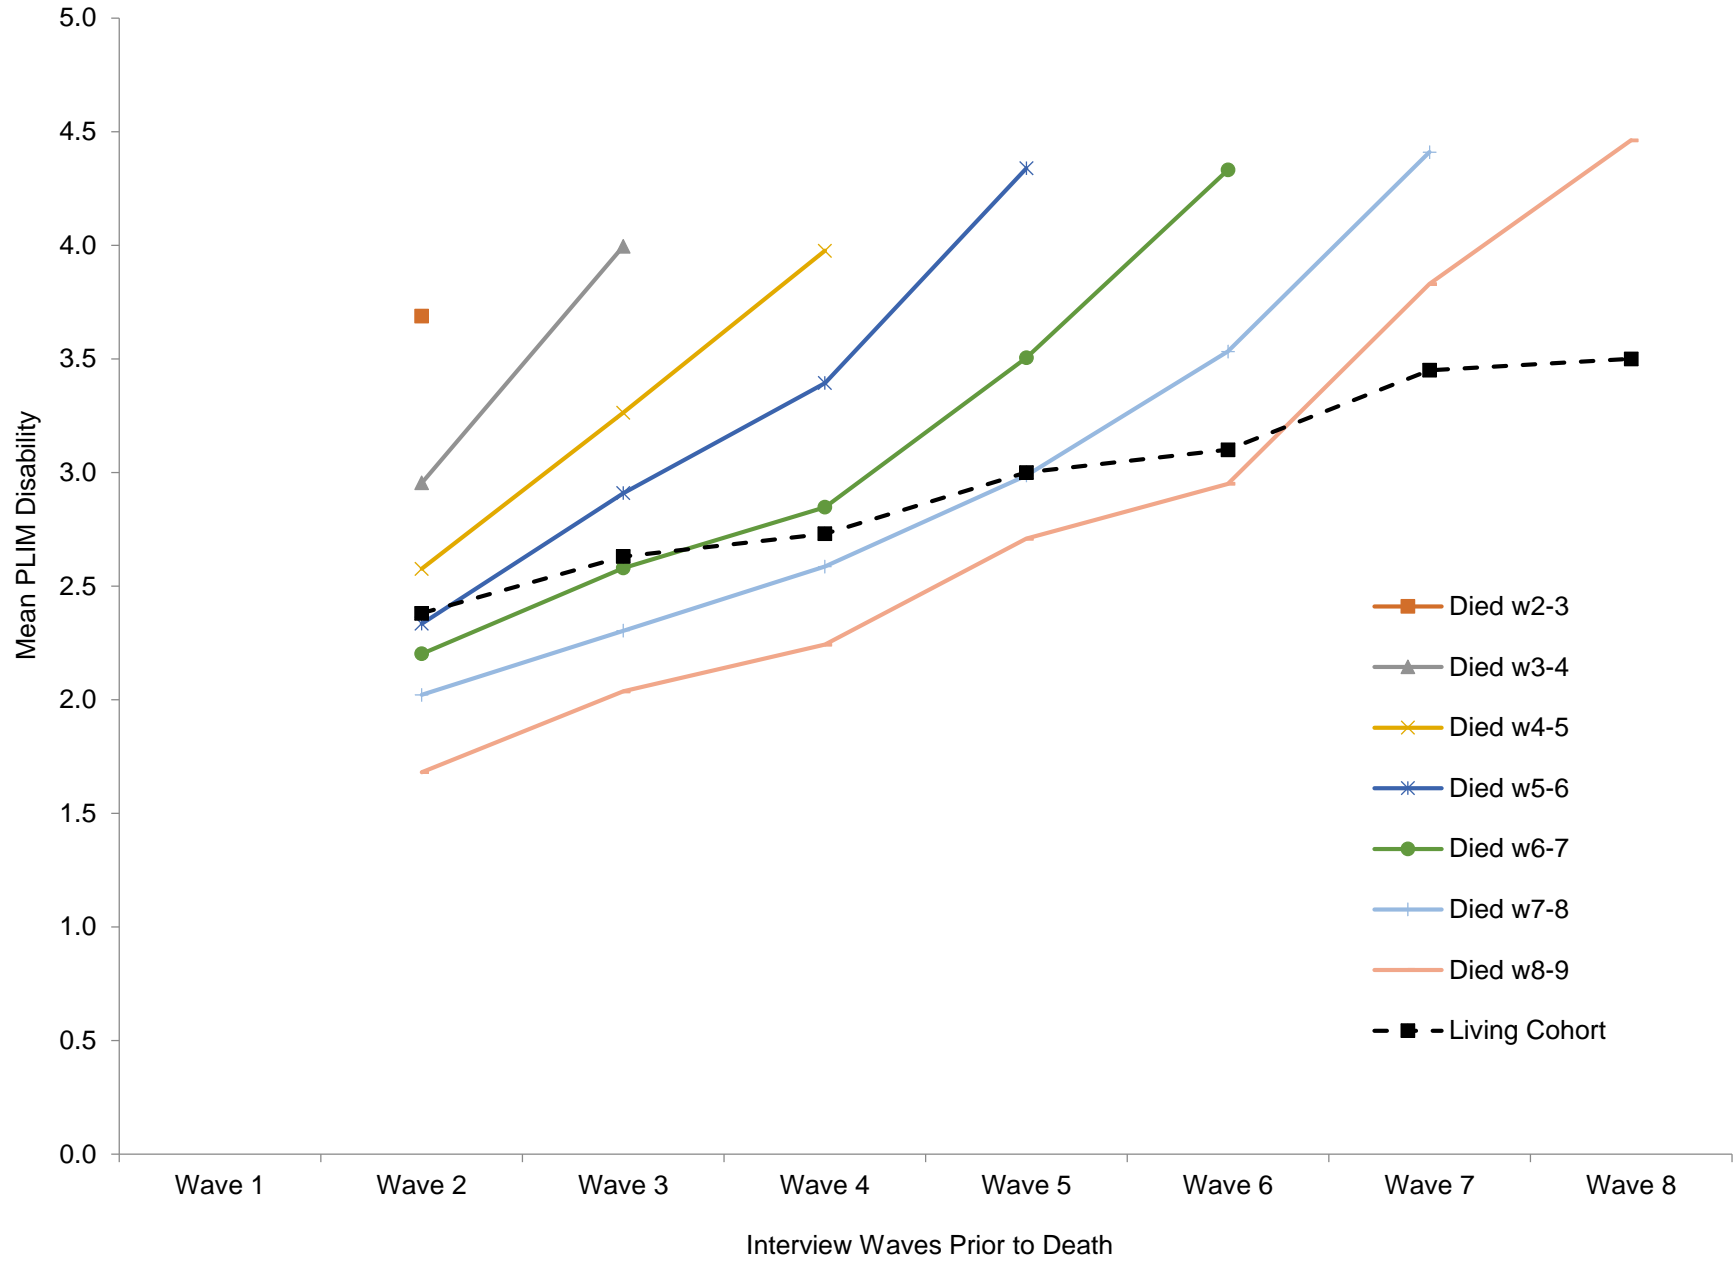

Figure S2A. Mean ADL Disability of AHEAD Survivor Groups (Total), 1993-2010.

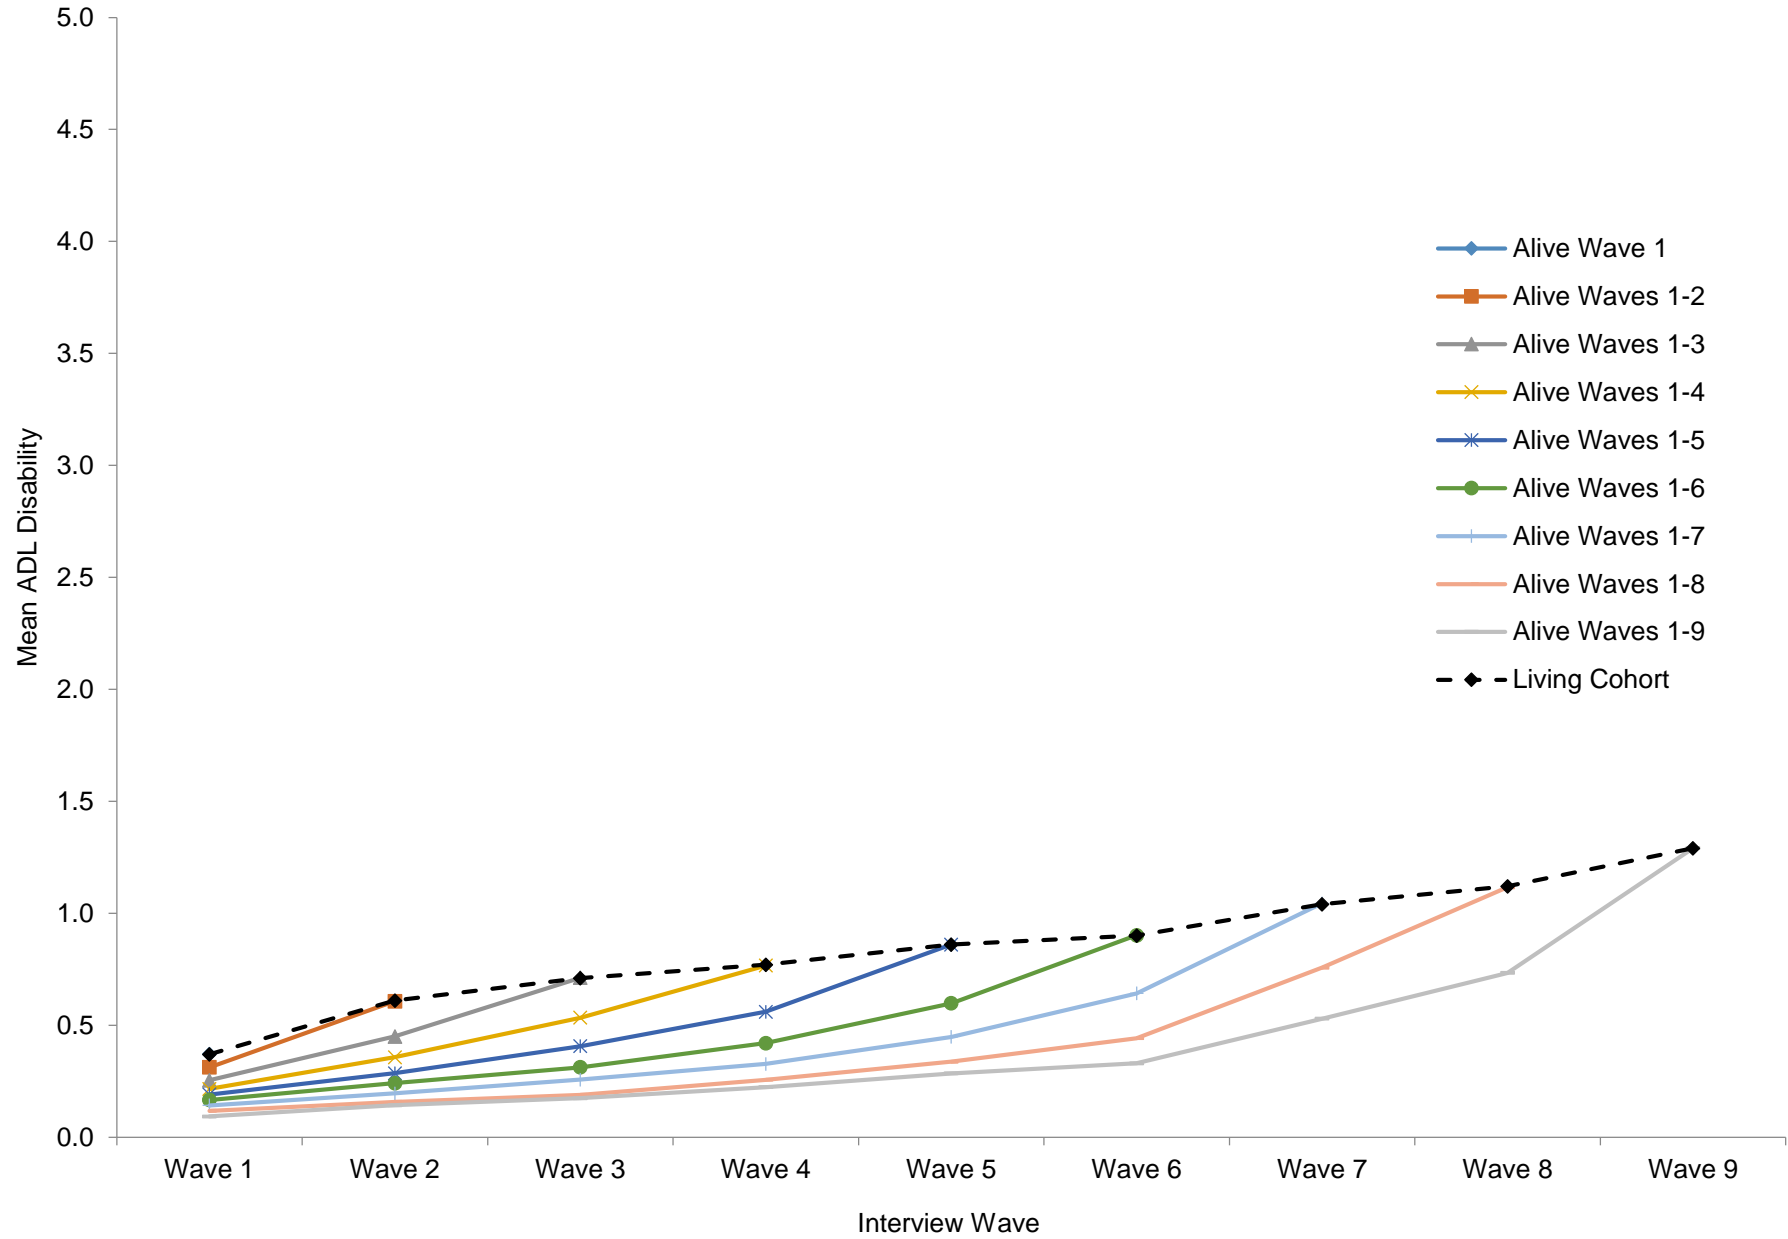







Figure S3B. Mean ADL Disability of AHEAD Decedent Groups (Baseline Ages 80+), 1993-2010.

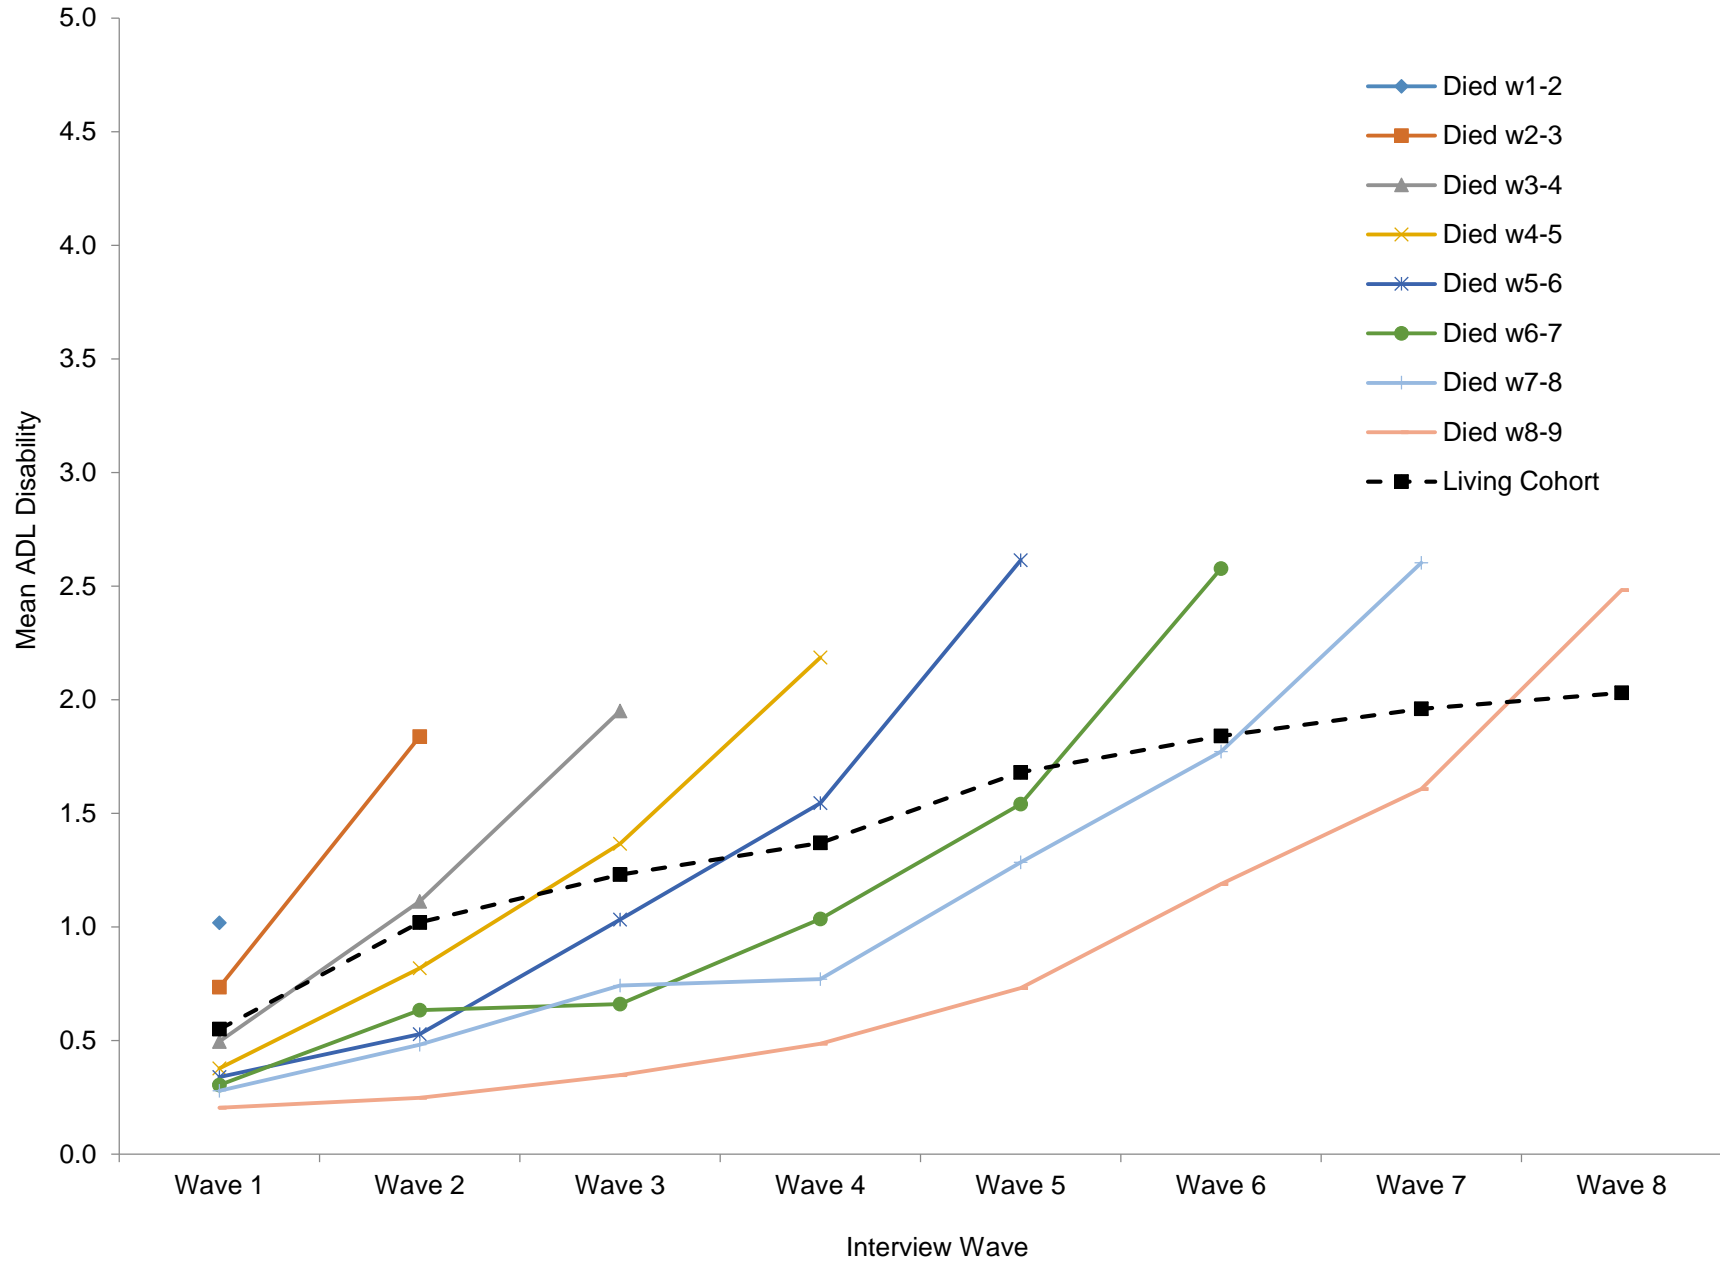



Figure S3C. Mean IADL Disability of AHEAD Decedent Groups (Baseline Ages 70-79), 1993-2010.

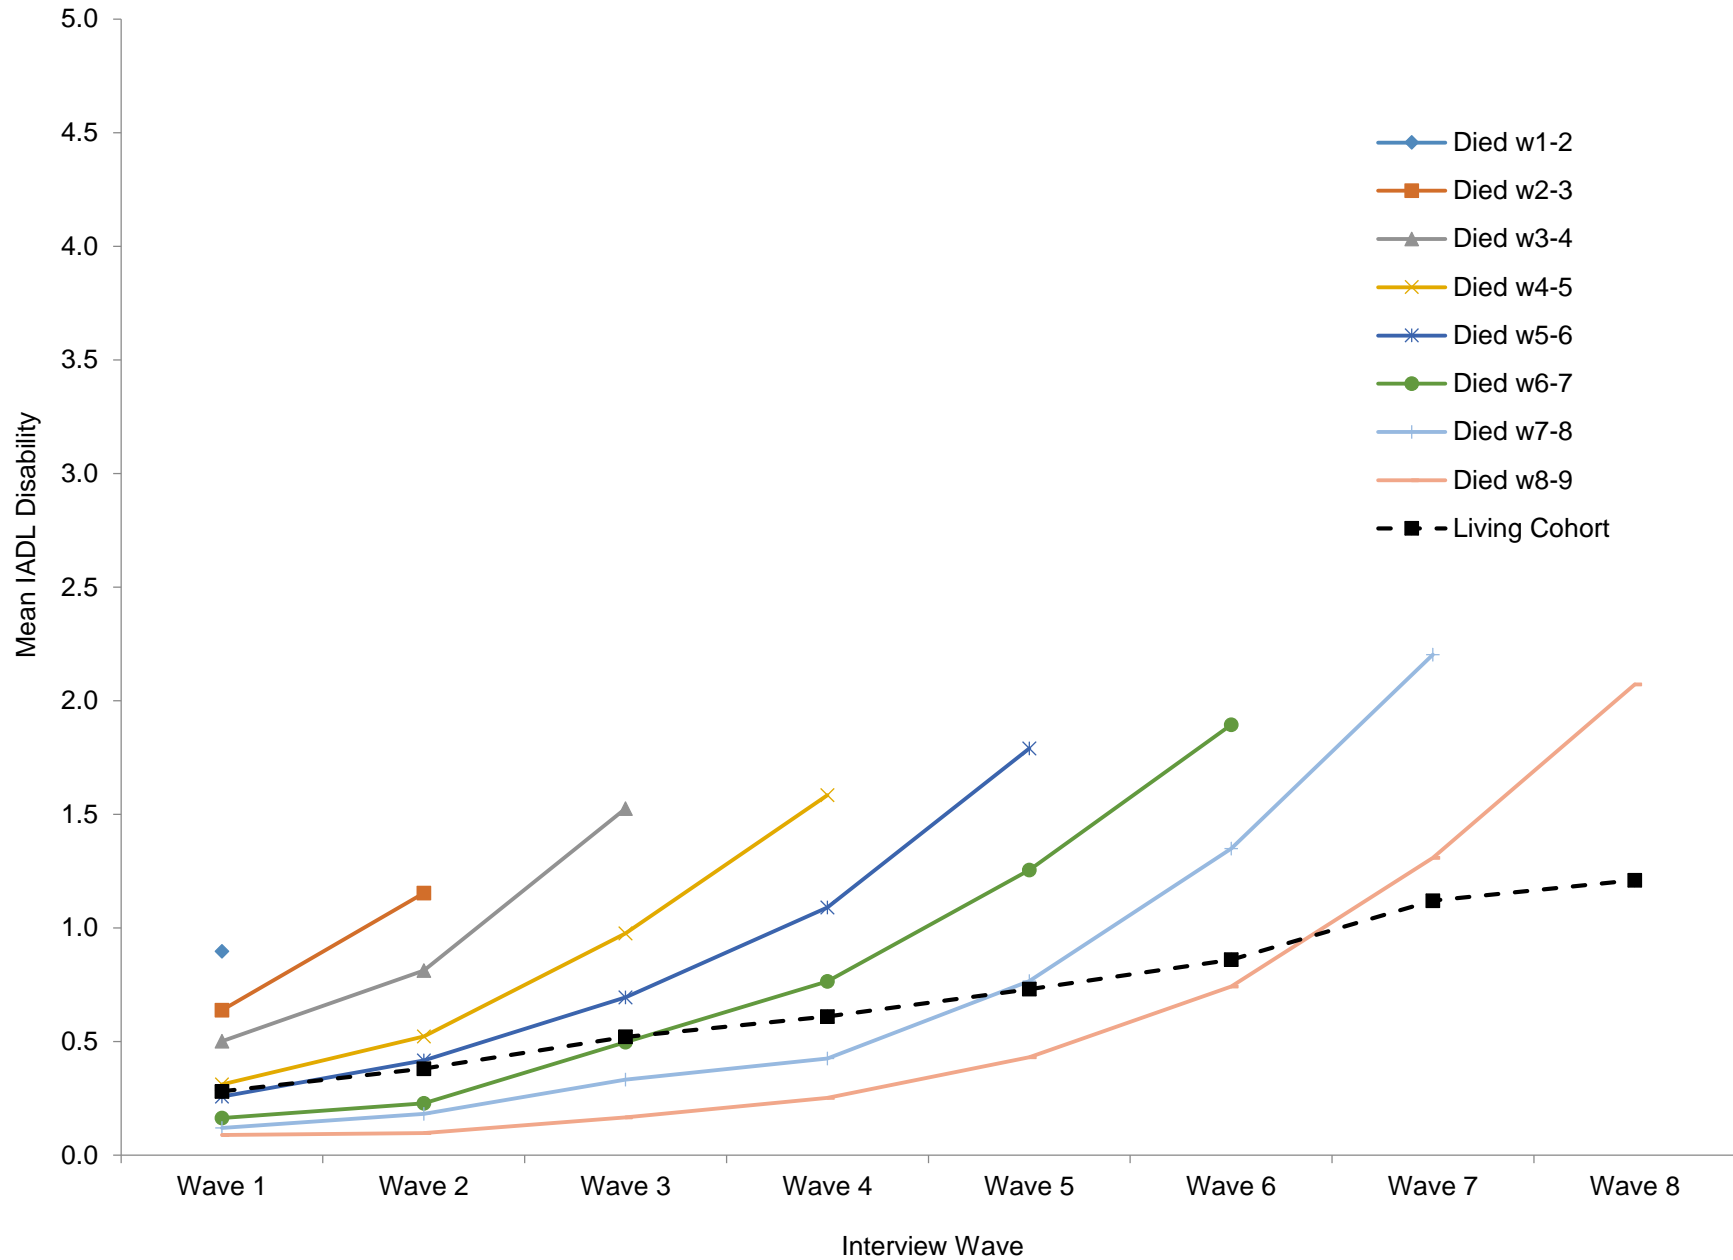

Figure S3D. Mean IADL Disability of AHEAD Decedent Groups (Baseline Ages 80+), 1993-2010.

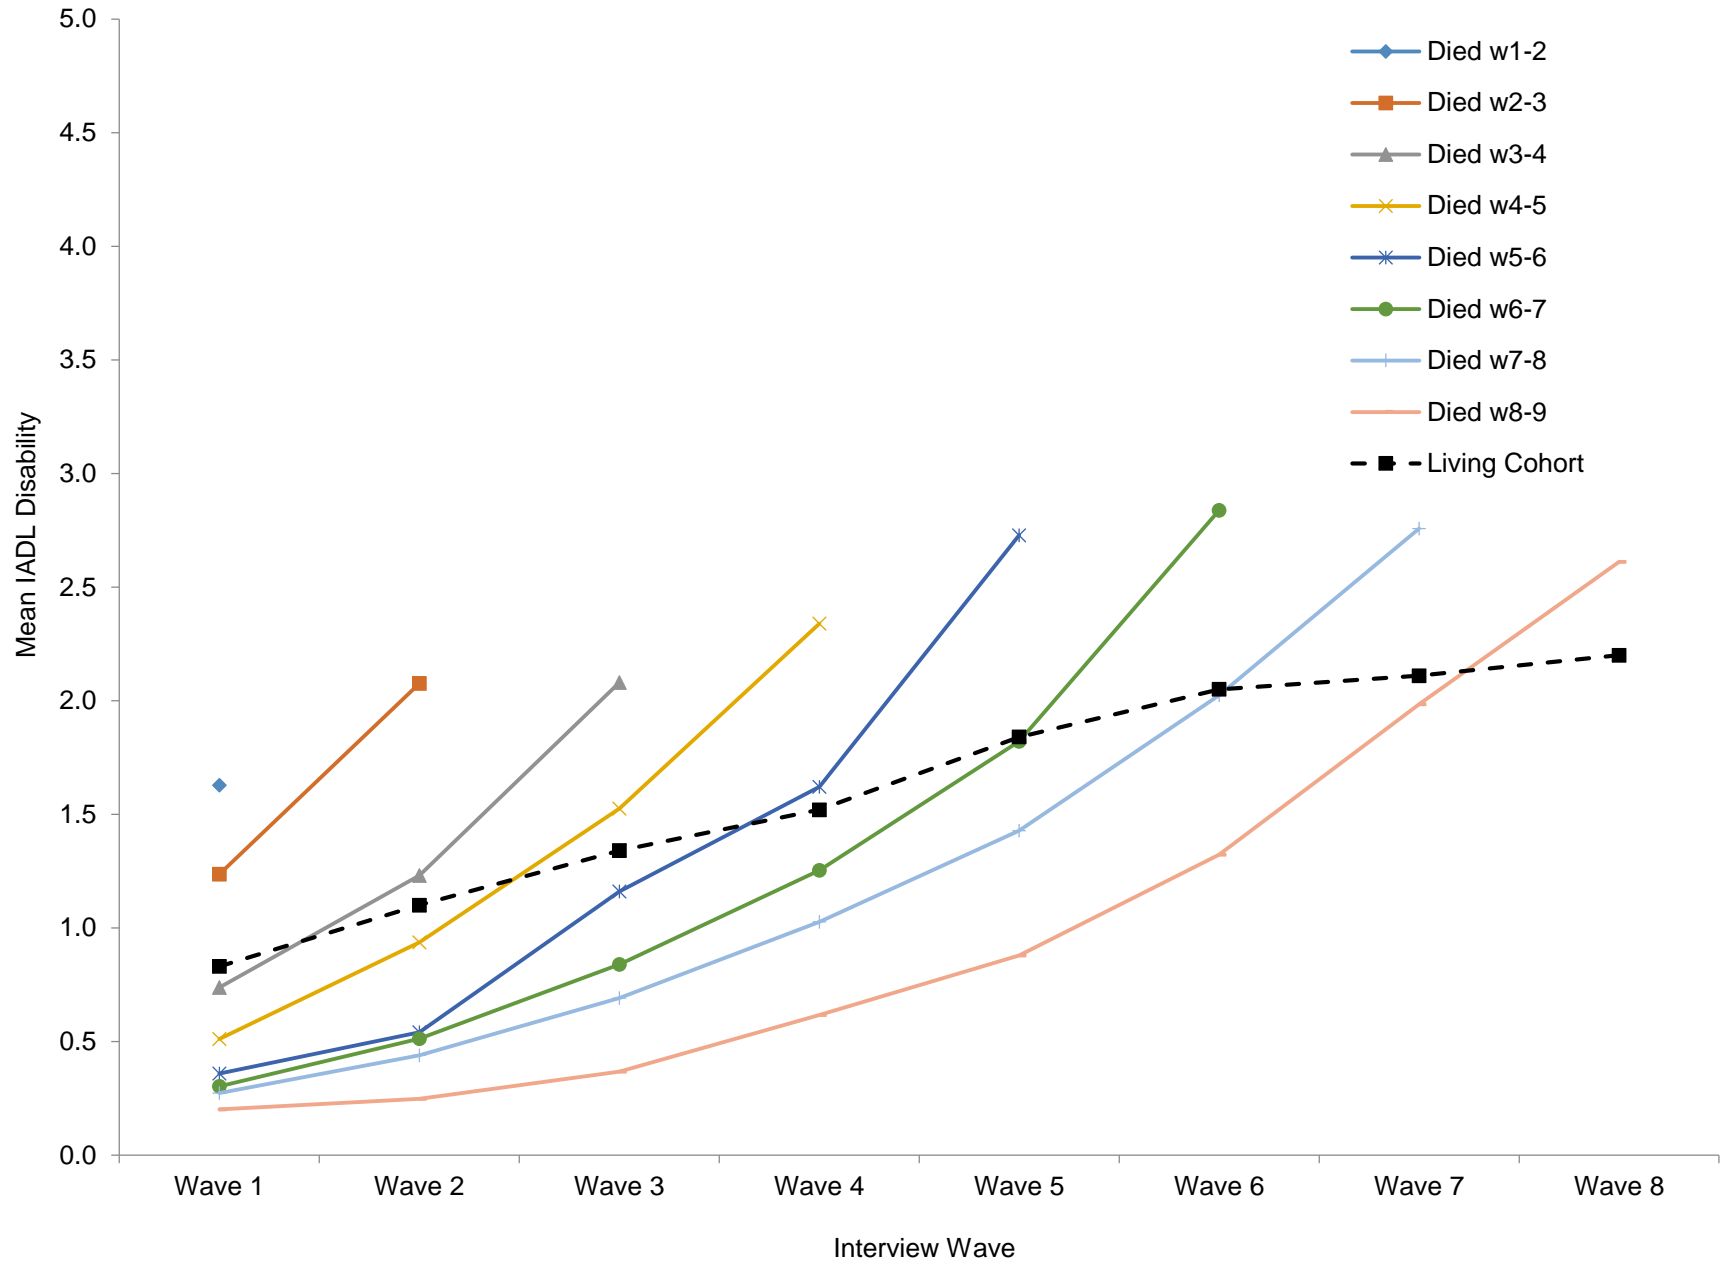

Figure S3E. Mean PLIM Disability of AHEAD Decedent Groups (Baseline Ages 70-79), 1993-2010.

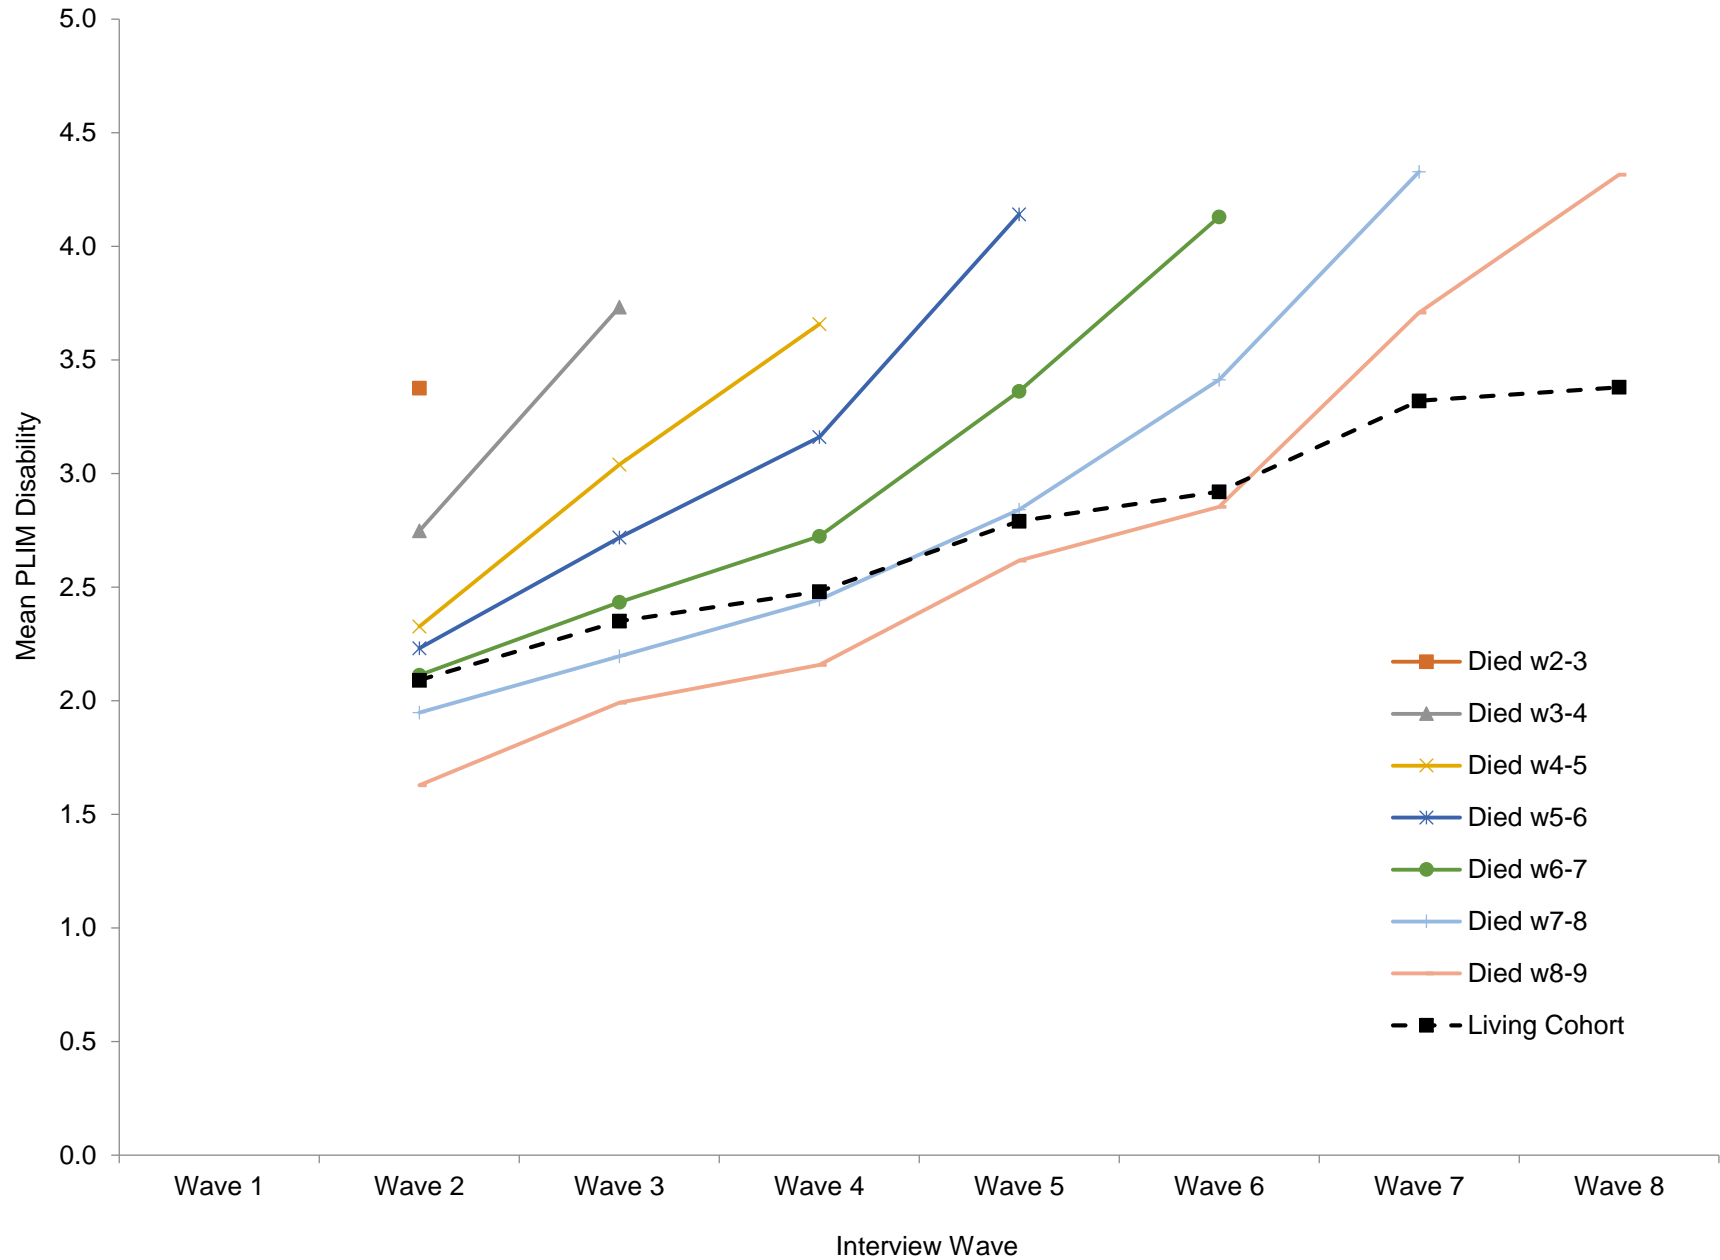

Figure S3F. Mean PLIM Disability of AHEAD Decedent Groups (Baseline Ages 80+), 1993-2010.

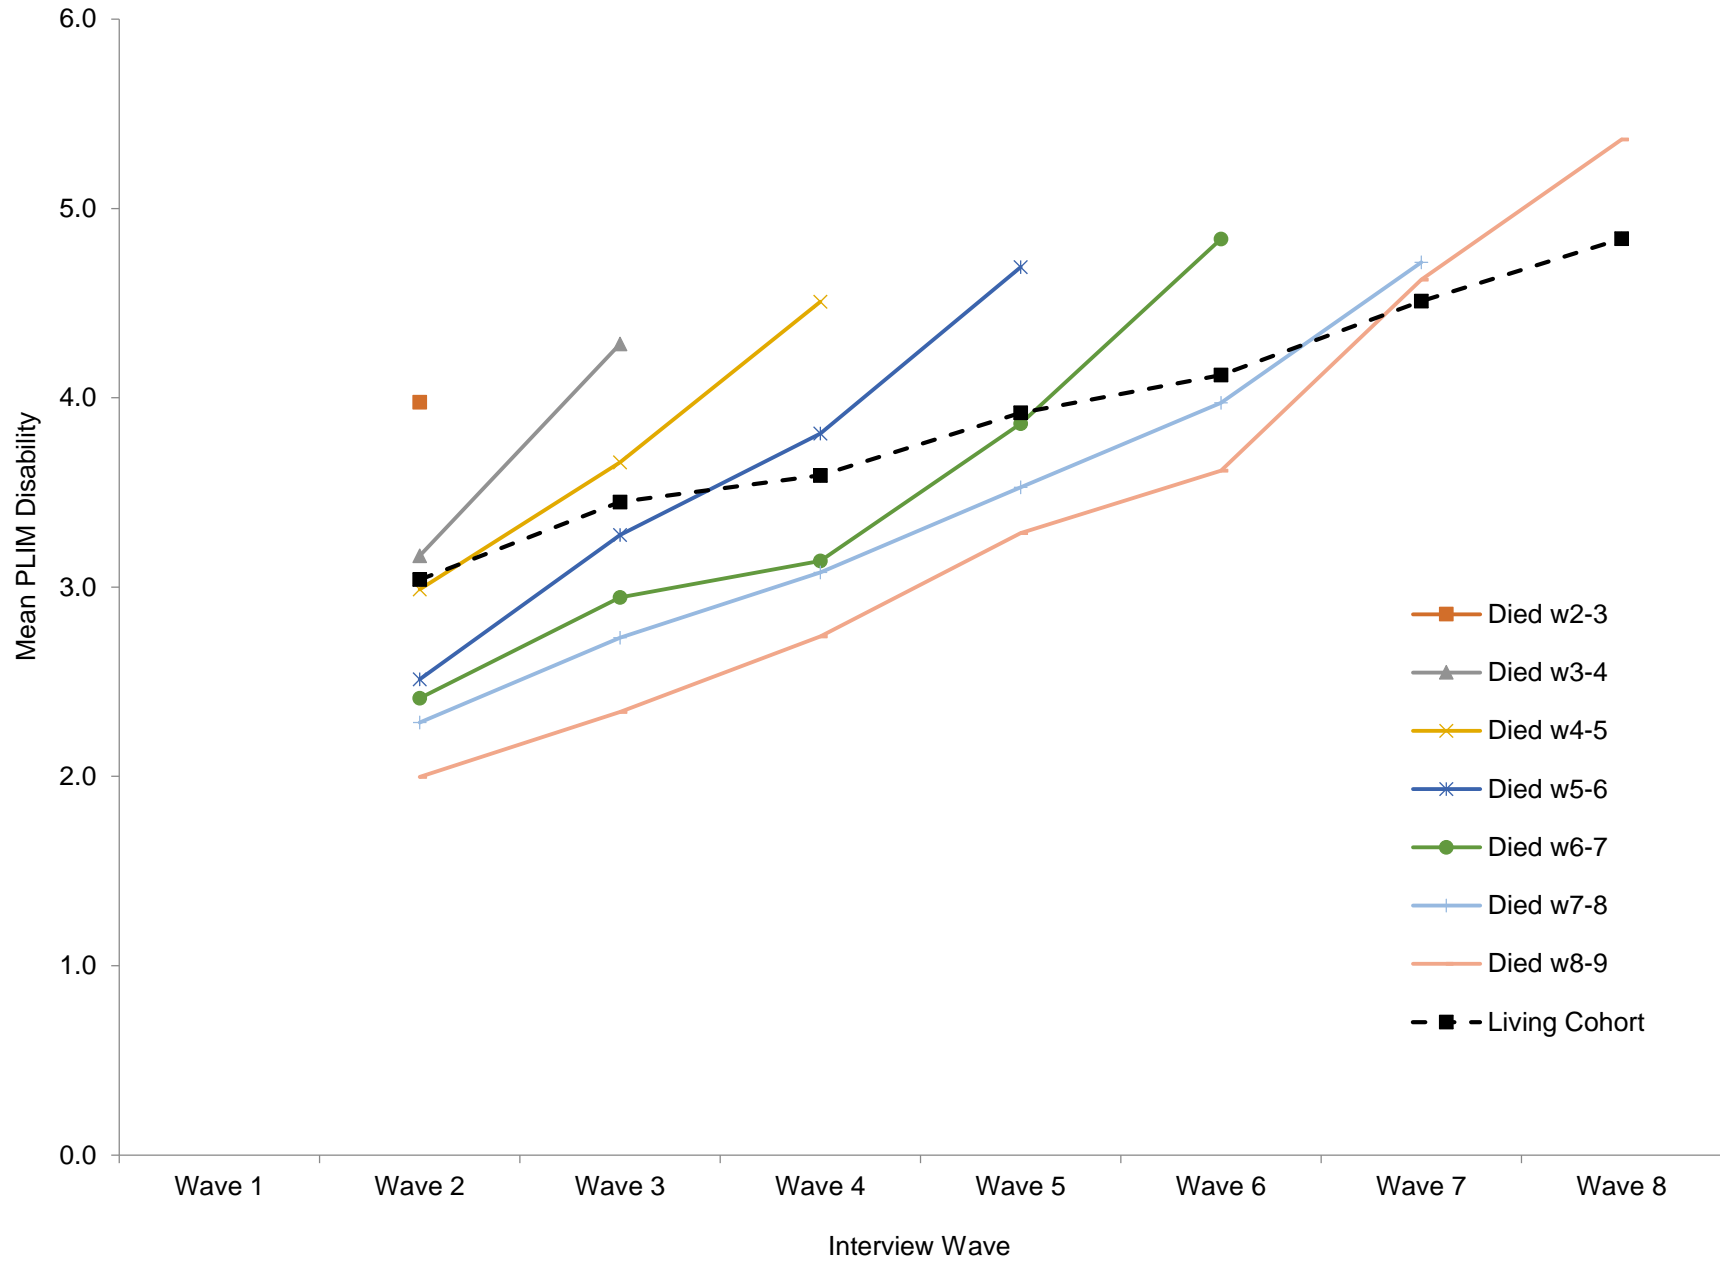

Figure S3G. Mean ADL Disability of AHEAD Decedent Groups (Women), 1993-2010.

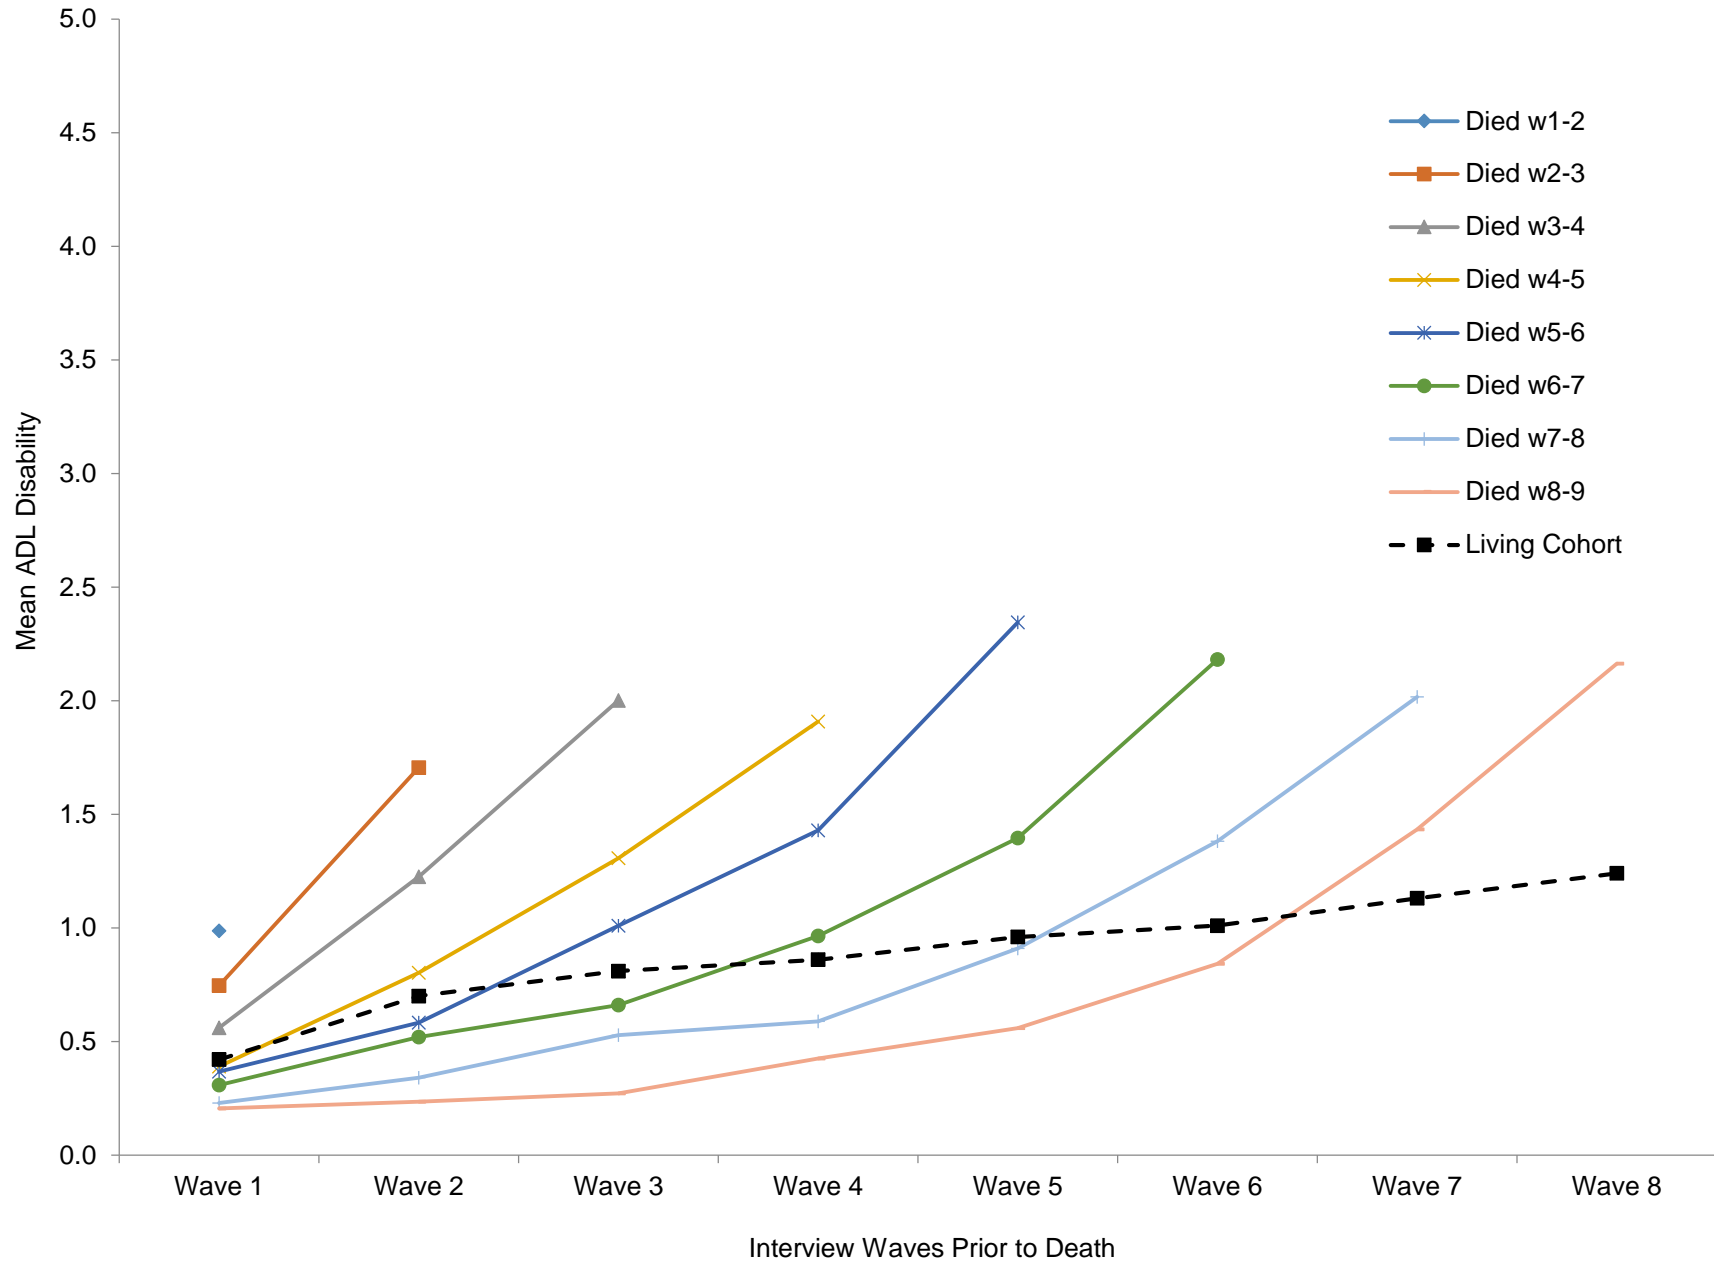

Figure S3H. Mean ADL Disability of AHEAD Decedent Groups (Men), 1993-2010.

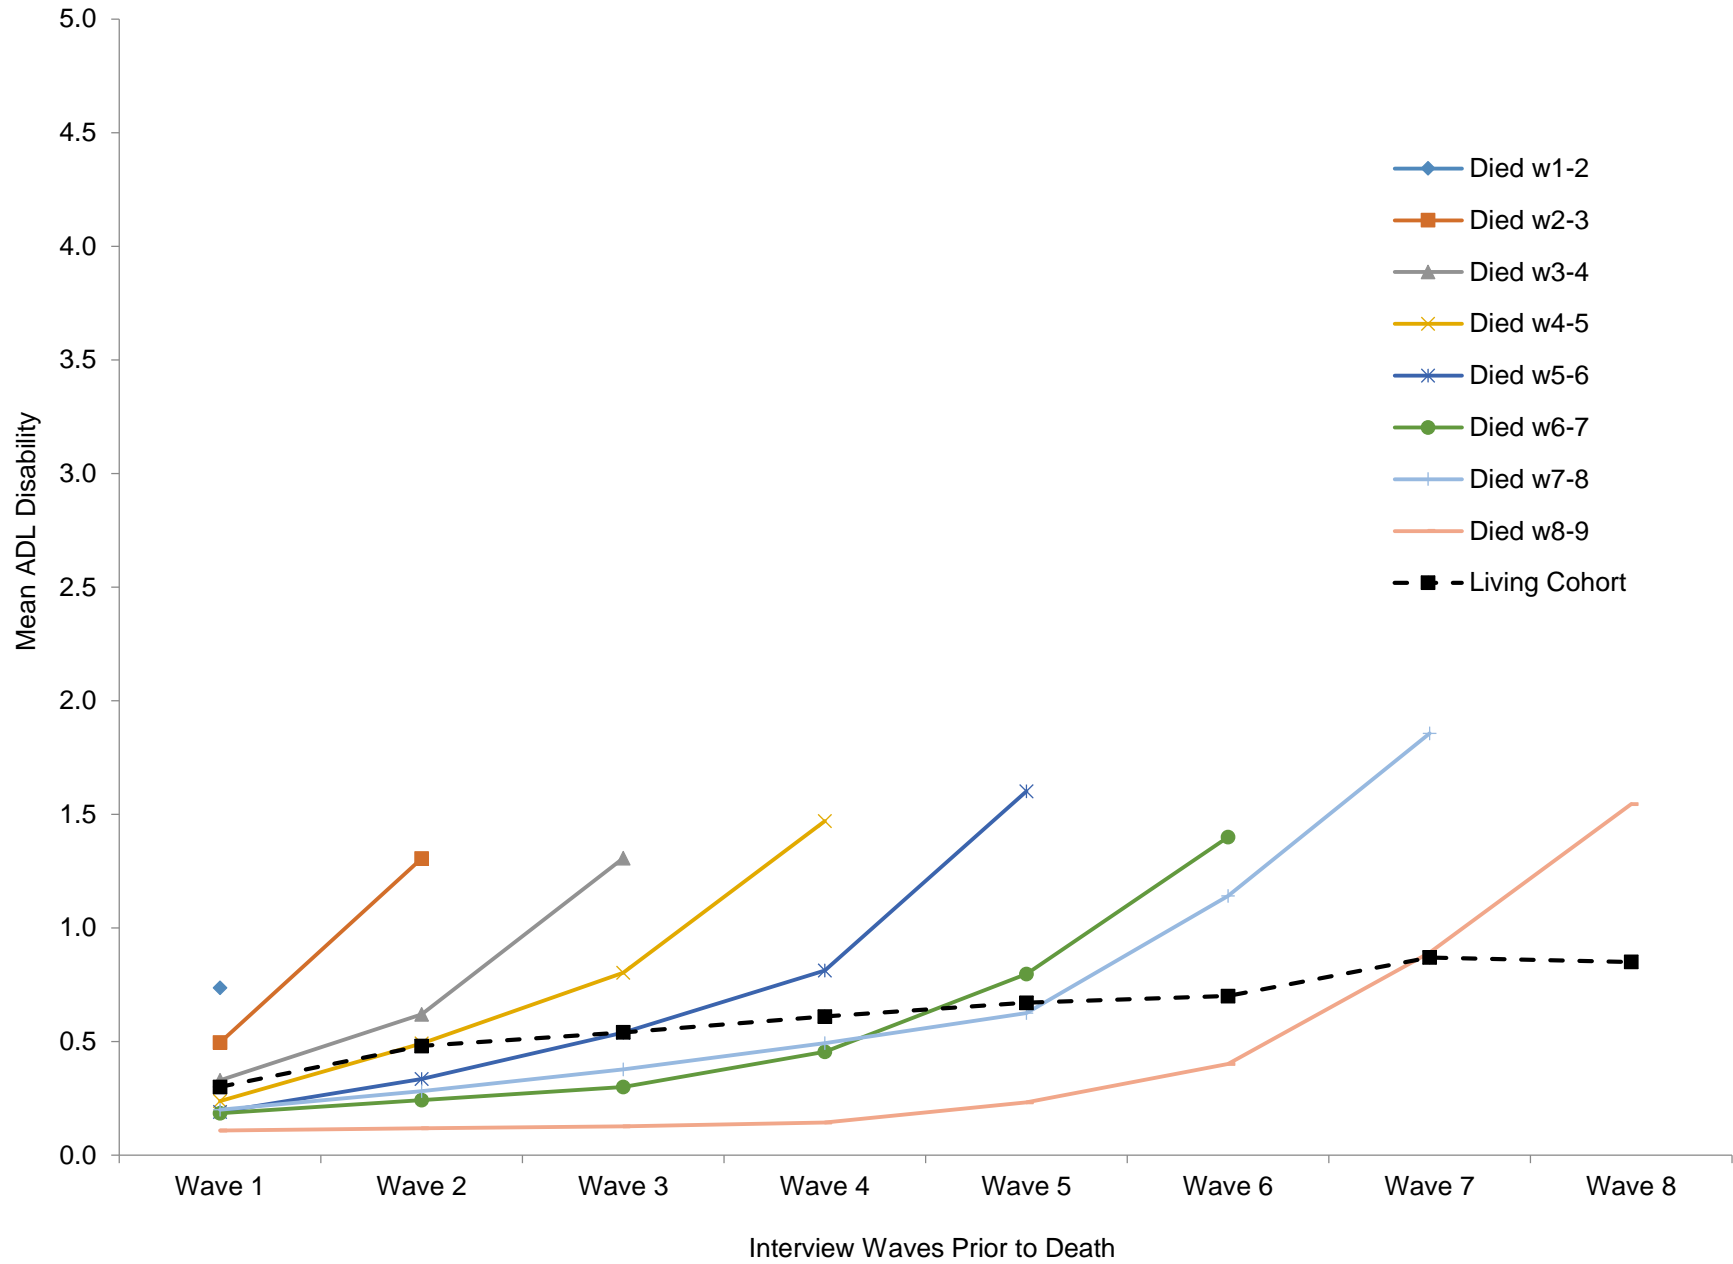

Figure S3I. Mean IADL Disability of AHEAD Decedent Groups (Women), 1993-2010.

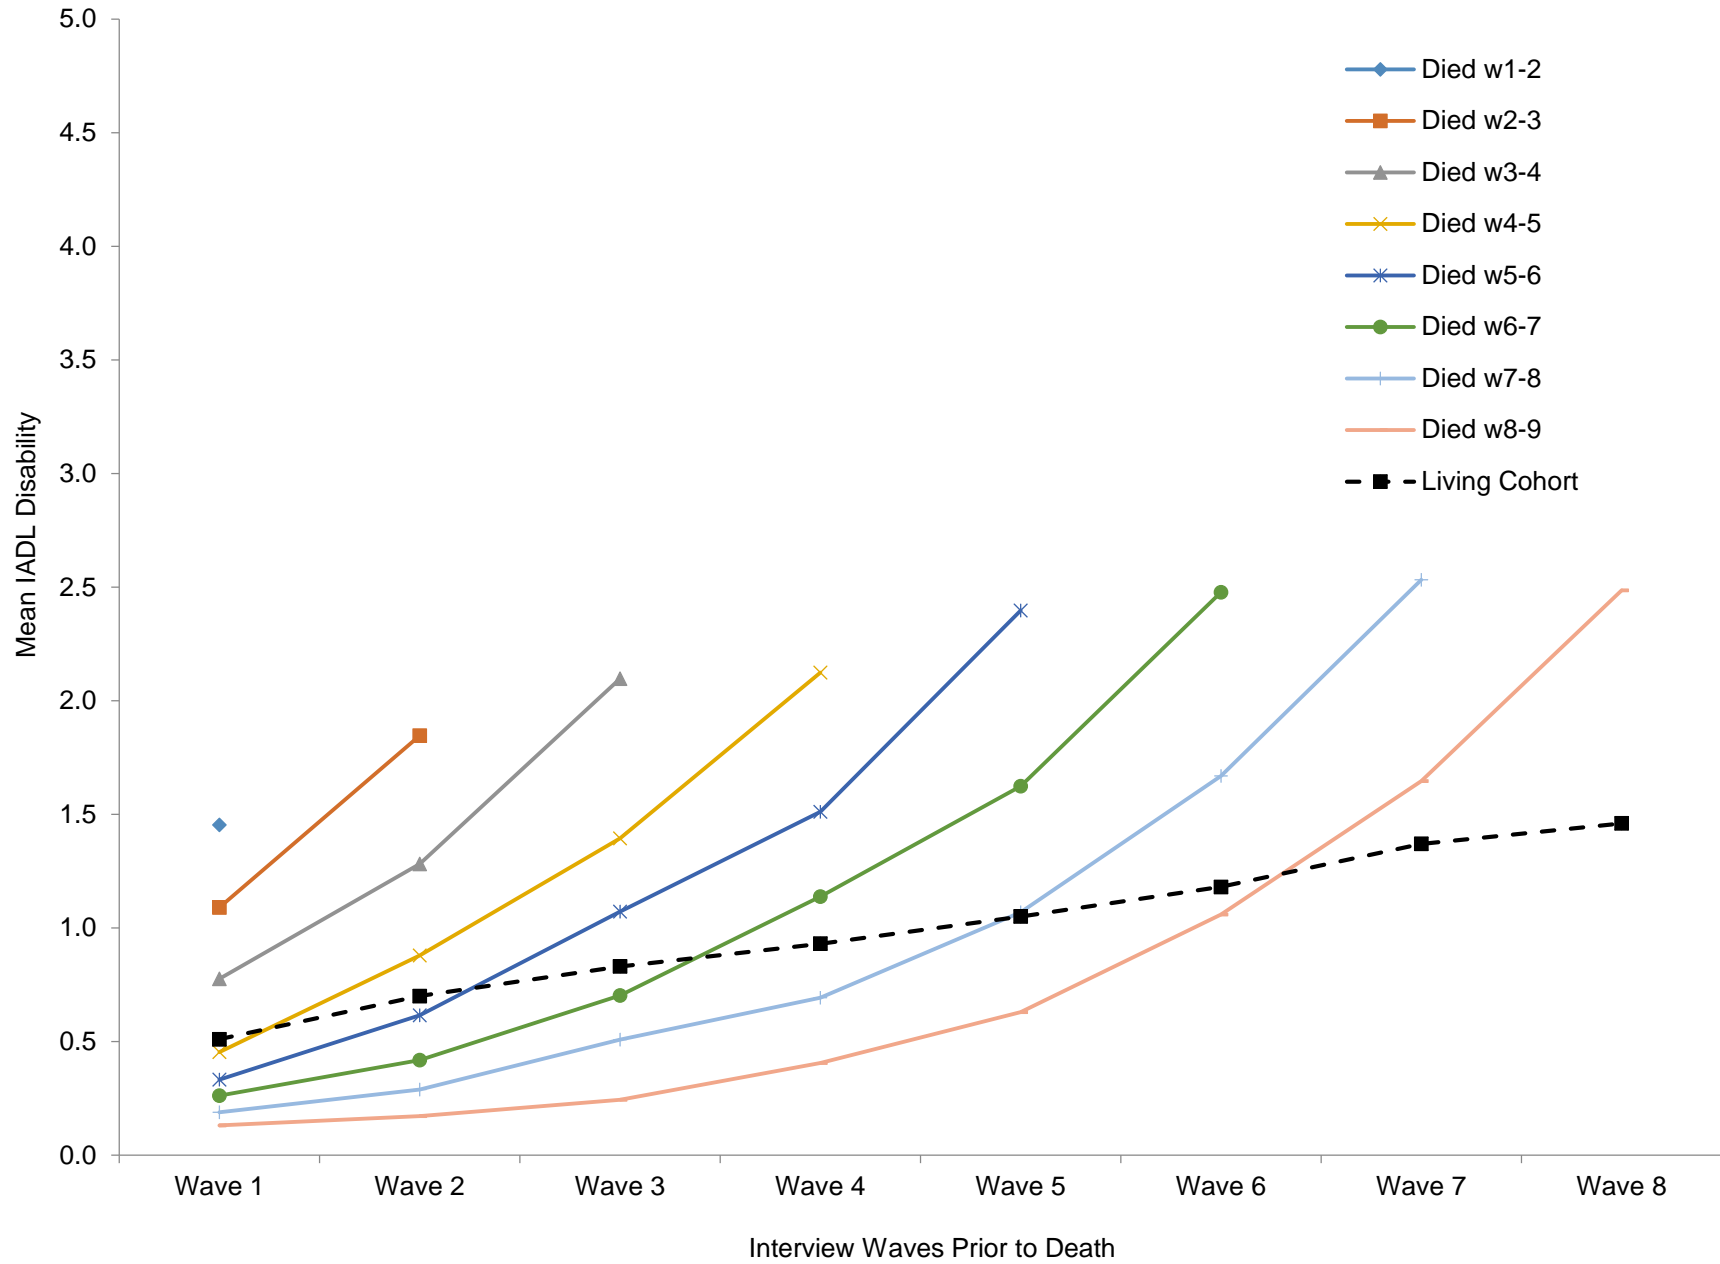

Figure S3J. Mean IADL Disability of AHEAD Decedent Groups (Men), 1993-2010.

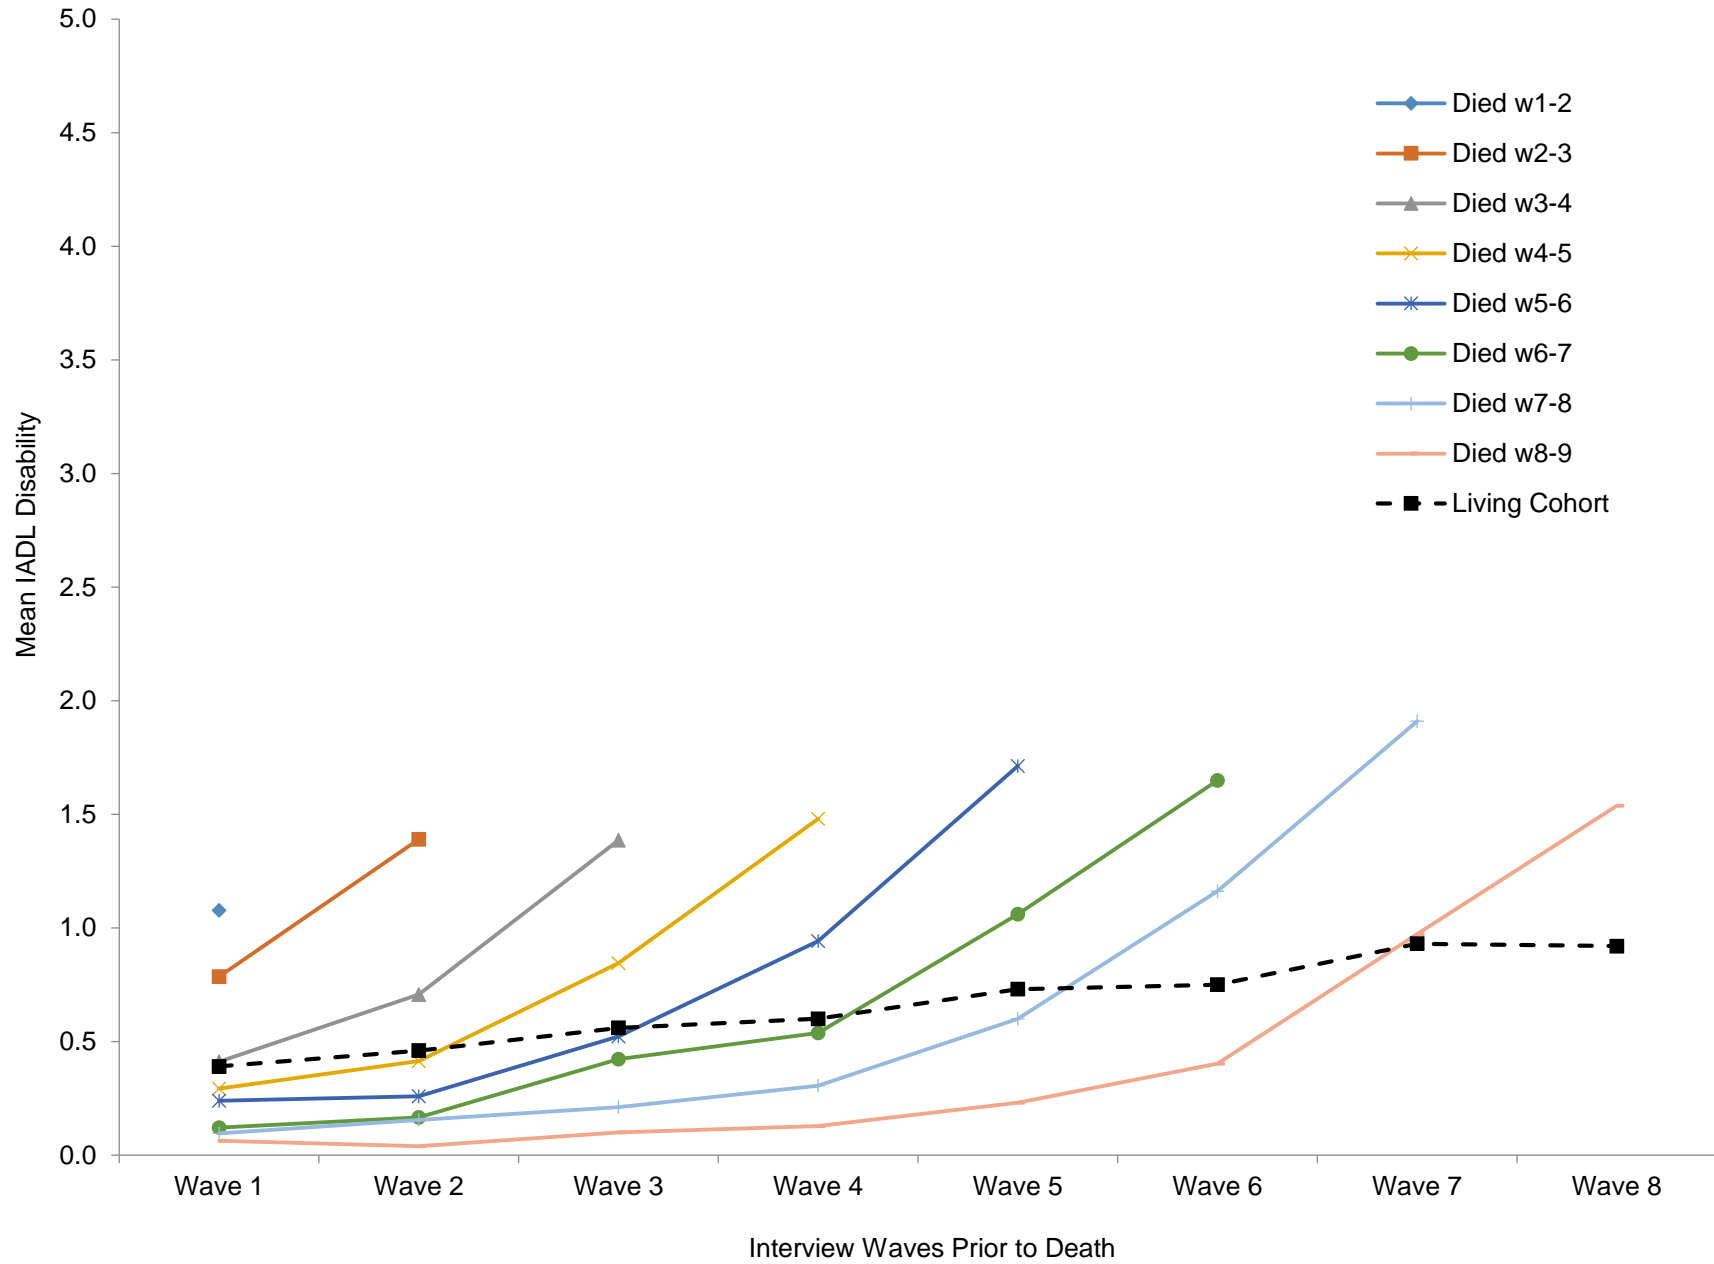



Figure S3K. Mean PLIM Disability of AHEAD Decedent Groups (Women), 1993-2010.

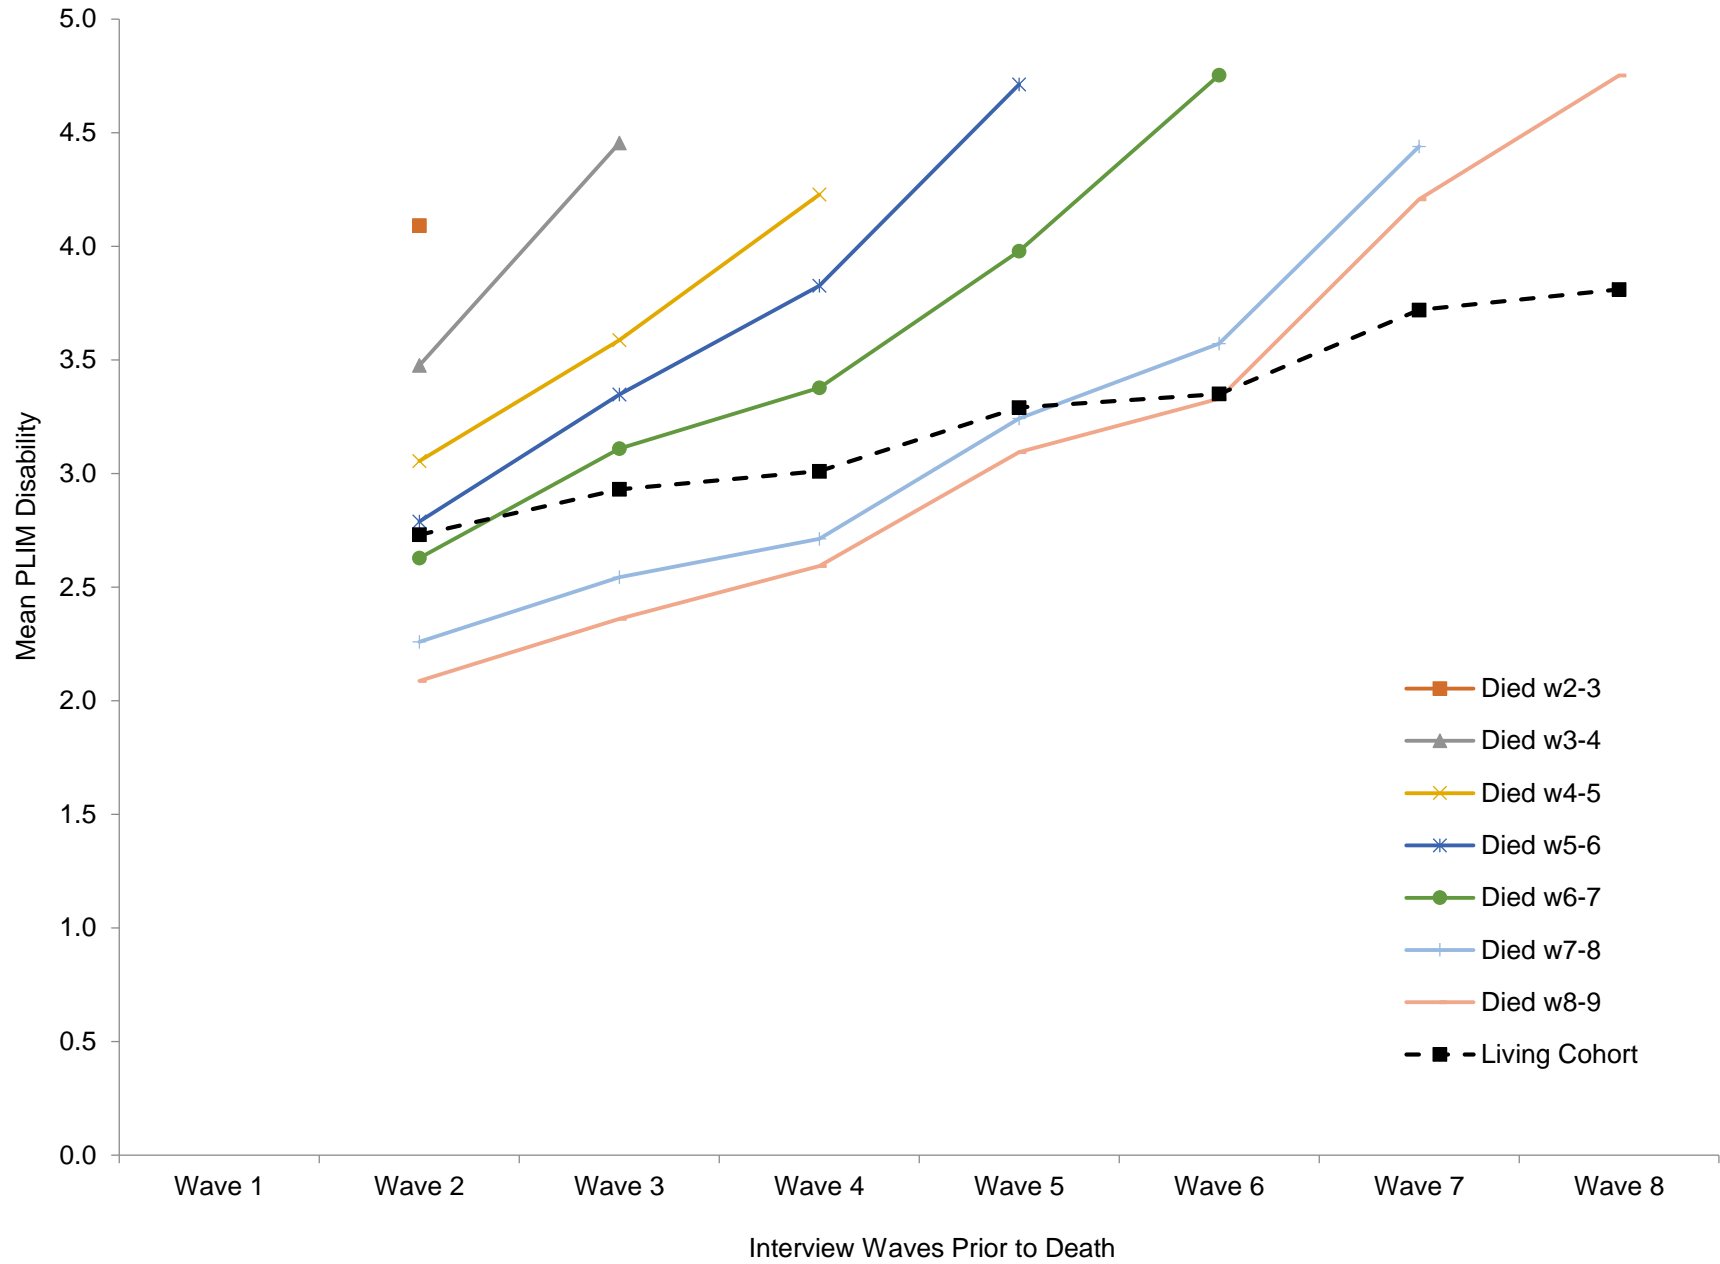

Figure S3L. Mean PLIM Disability of AHEAD Decedent Groups (Men), 1993-2010.

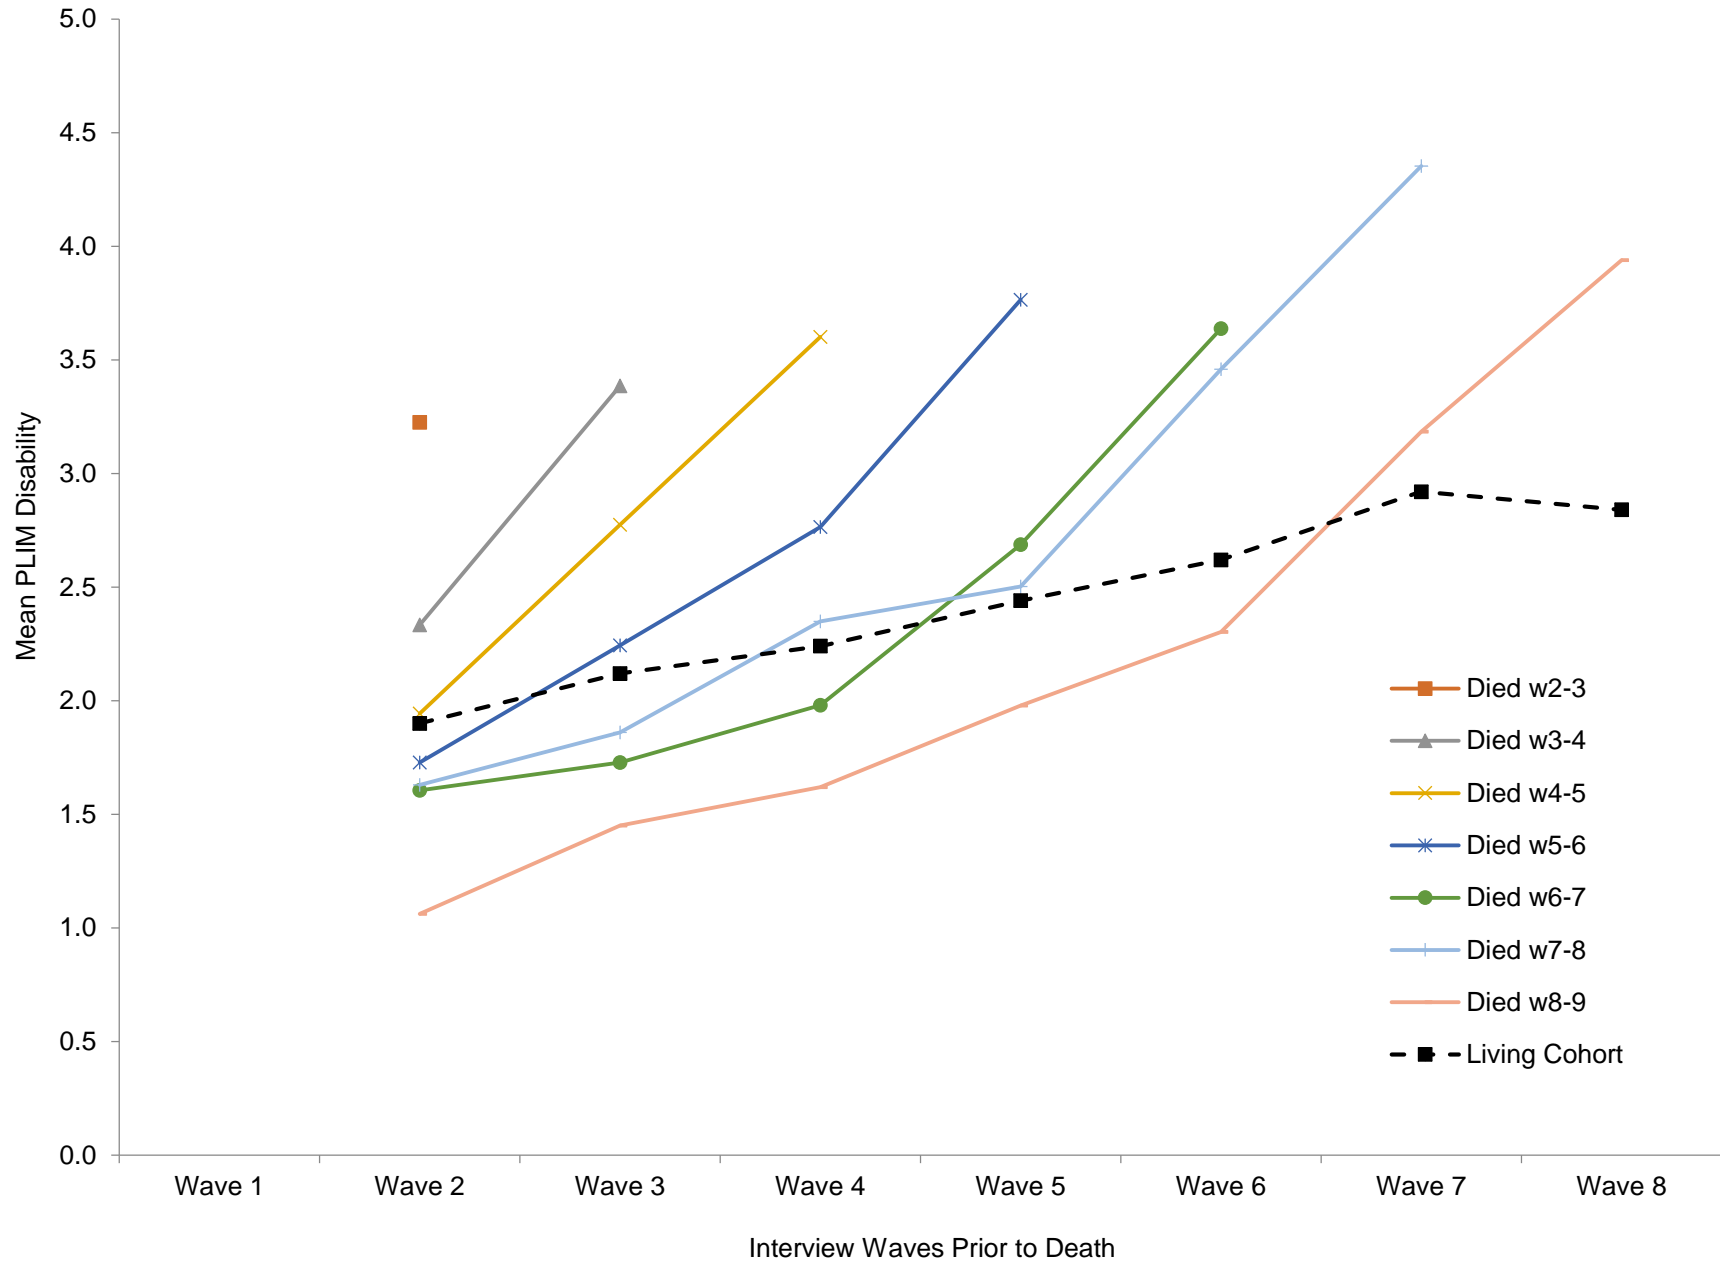

















Figure S4H. Mean ADL Disability of AHEAD Survivor Groups (Men), 1993-2010.

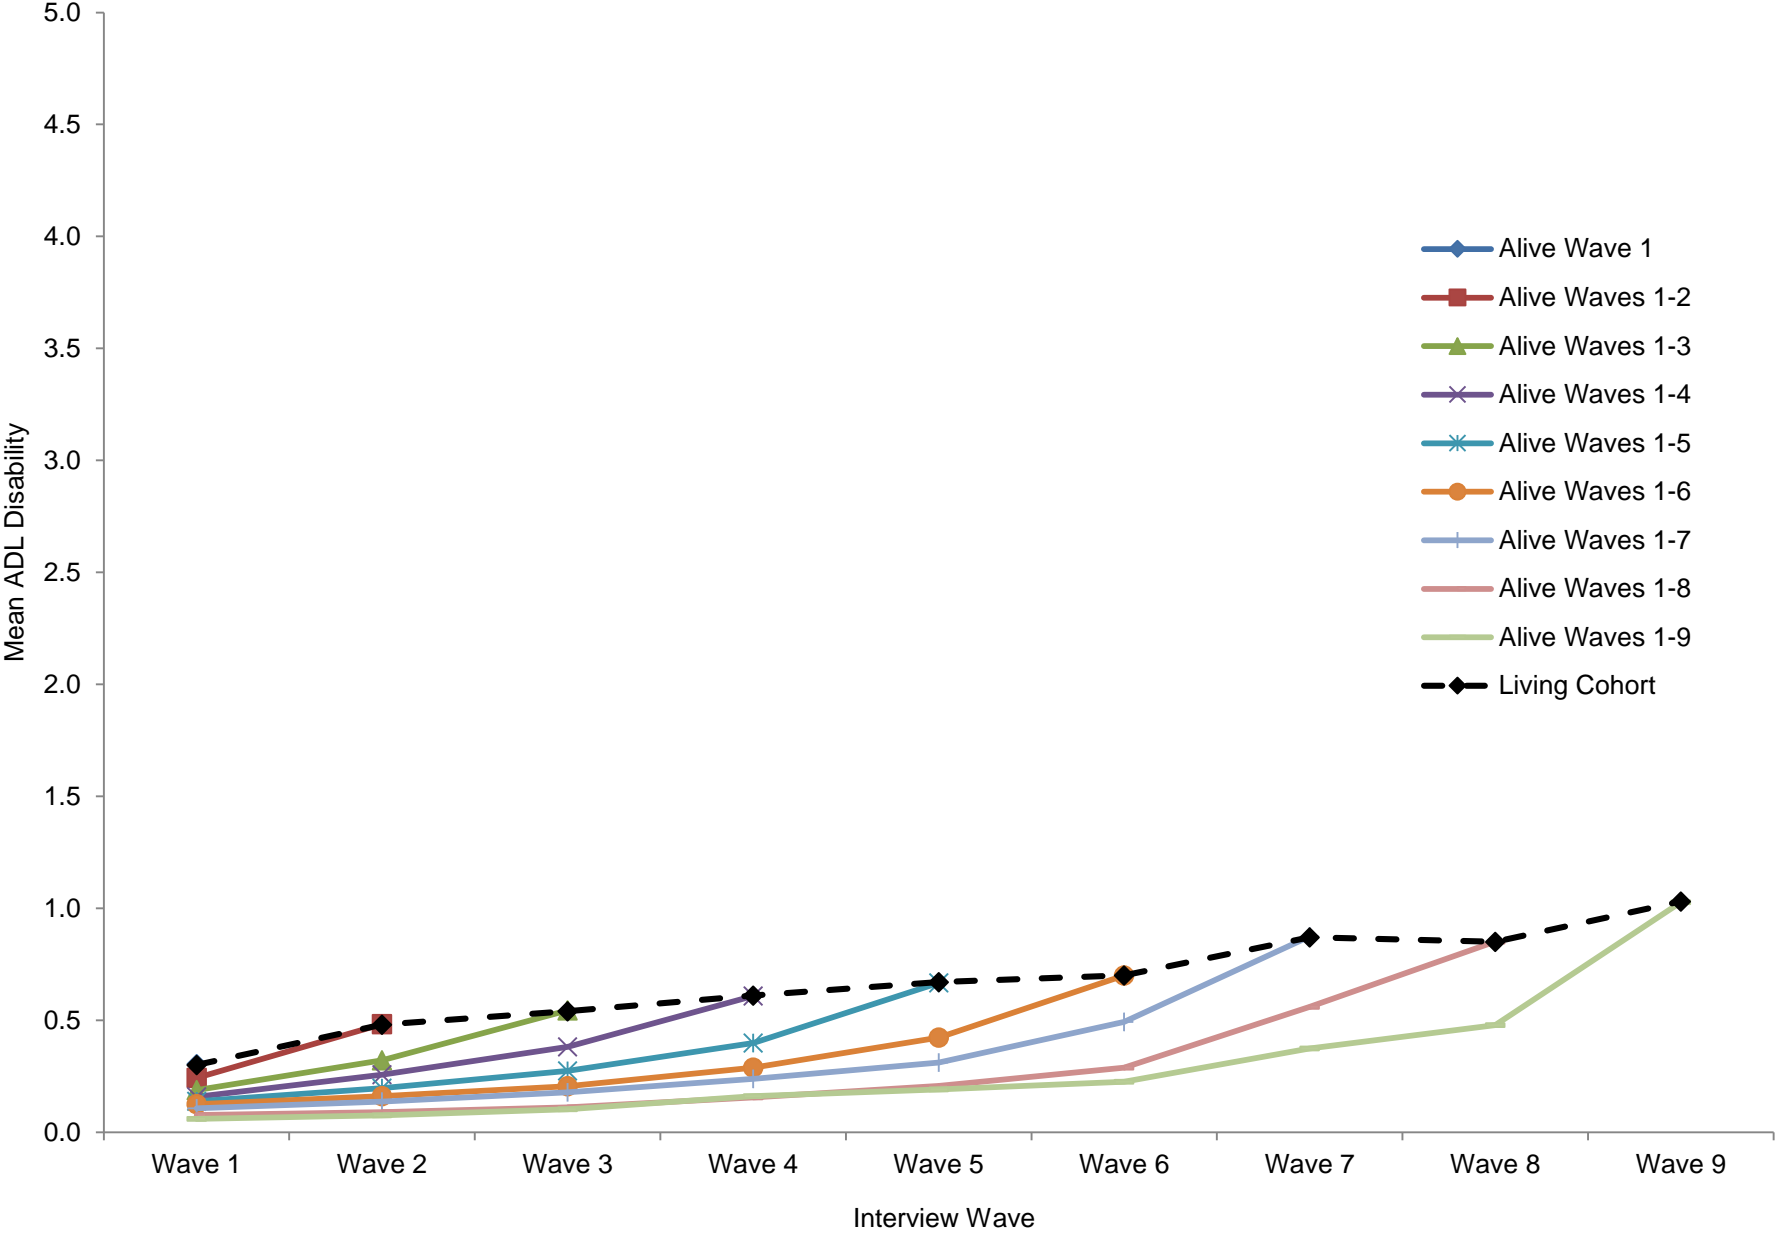

Supplement: supp_gbw002_AHEADSupplTabFigFinal.pdf [file supp_gbw002_AHEADSupplTabFigFinal.pdf]
